# Supplementary material
Source: MDPI journal article supplement (https://www.mdpi.com/2227-7072/5/4/25)
Supplement: s1 [file s1]

## Sheet: Sheet1
Team	Operating Income (M$)	Expenses (M$)	Expenses/League Mean	Average attendance	Ln (Average Attendance)	Pop	Ln Pop	Local competition	Salaries / pop € or $	Salaries / pop $	Ln (Sal / pop) $	Perf sport n CL or playoffs	Perf sport n-1 CL or playoffs	Nb CL Europe / Titles US	% CL Europe / Titles US	Year / building	Stadium age	Stadium ownership	League	Sport	Year	MLB	NBA	NHL	NFL	England	France	Germany	Italy	Spain	2011	2012	Facebook (01/02/n+1)	Ln Facebook	Twitter (01/02/n+1)	Ln Twitter
Arsenal	86.3333	249.667	1.15045	60025	11.0025	12448448	16.3371	2	26762	36797.8	10.5132	2	3	0	0	2006	5	1	England	Soccer	2011	0	0	0	0	1	0	0	0	0	1	0	8664700	15.9748	1199000	13.997
Chelsea	-29	342	1.57592	41435	10.6319	12448448	16.3371	2	26762	36797.8	10.5132	3	2	0	0	1877	134	1	England	Soccer	2011	0	0	0	0	1	0	0	0	0	1	0	8382600	15.9417	610700	13.3224
Liverpool	49	227	1.046	42820	10.6648	5327077	15.4883	2	15011.6	20641	9.93503	0	1	5	0.0892857	1884	127	1	England	Soccer	2011	0	0	0	0	1	0	0	0	0	1	0	8000300	15.895	698300	13.4564
Manchester City	-15	168	0.774134	45905	10.7343	5327077	15.4883	2	15011.6	20641	9.93503	0	0	0	0	2002	9	0	England	Soccer	2011	0	0	0	0	1	0	0	0	0	1	0	1707300	14.3504	217800	12.2913
Manchester United	140.333	287.667	1.32555	75109	11.2267	5327077	15.4883	2	15011.6	20641	9.93503	5	3	3	0.0535714	1910	101	1	England	Soccer	2011	0	0	0	0	1	0	0	0	0	1	0	21954500	16.9045	90500	0
Tottenham Hotspur	56.3333	122.667	0.565241	35704	10.483	12448448	16.3371	2	26762	36797.8	10.5132	3	0	0	0	1899	112	1	England	Soccer	2011	0	0	0	0	1	0	0	0	0	1	0	964700	13.7796	133200	11.7996
Olympique Lyonnais	38	141	0.64972	35266	10.4707	1771459	14.3873	0	21939.2	30166.4	10.3145	2	4	0	0	1920	91	0	France	Soccer	2011	0	0	0	0	0	1	0	0	0	1	0	389100	12.8716	17400	9.76423
Olympique Marseille	17.3333	155.667	0.717303	51081	10.8412	1621766	14.299	0	19927.5	27400.3	10.2183	2	1	1	0.0178571	1937	74	0	France	Soccer	2011	0	0	0	0	0	1	0	0	0	1	0	1529200	14.2403	168900	12.0371
Bayern Munich	64	332	1.52984	69000	11.1419	2312477	14.6538	0	24718	33987.2	10.4337	2	5	4	0.0714286	2005	6	1	Germany	Soccer	2011	0	0	0	0	0	0	1	0	0	1	0	2825700	14.8543	0	0
Borussia Dortmund	16	108	0.497658	79151	11.2791	11316429	16.2418	1	22723.3	31244.5	10.3496	0	0	1	0.0178571	1974	37	1	Germany	Soccer	2011	0	0	0	0	0	0	1	0	0	1	0	901600	13.7119	33200	10.4103
Hamburg SV	42	137	0.631288	54446	10.905	3266896	14.9994	0	28818.2	39625	10.5872	0	0	1	0.0178571	1953	58	1	Germany	Soccer	2011	0	0	0	0	0	0	1	0	0	1	0	306800	12.634	19400	9.87303
Schalke 04	23.3333	147.667	0.680439	61320	11.0239	11316429	16.2418	1	22723.3	31244.5	10.3496	4	0	0	0	2001	10	1	Germany	Soccer	2011	0	0	0	0	0	0	1	0	0	1	0	410500	12.9251	8200	9.01189
VfB Stuttgart	18	123	0.566777	39012	10.5716	1759485	14.3805	0	26178.3	35995.2	10.4911	0	2	0	0	1933	78	1	Germany	Soccer	2011	0	0	0	0	0	0	1	0	0	1	0	230900	12.3497	3100	8.03916
Werder Bremen	20.6667	126.333	0.582137	37367	10.5285	1184407	13.9848	0	22958	31567.2	10.3599	1	0	0	0	1909	102	1	Germany	Soccer	2011	0	0	0	0	0	0	1	0	0	1	0	336700	12.7269	28300	10.2506
AC Milan	51	238	1.09669	53916	10.8952	7123563	15.7789	1	23411.8	32191.2	10.3794	2	2	7	0.125	1926	85	0	Italy	Soccer	2011	0	0	0	0	0	0	0	1	0	1	0	7852200	15.8763	327500	12.6992
Internazionale Milan	11.3333	263.667	1.21496	59697	10.997	7123563	15.7789	1	23411.8	32191.2	10.3794	3	6	3	0.0535714	1926	85	0	Italy	Soccer	2011	0	0	0	0	0	0	0	1	0	1	0	437800	12.9895	93900	11.45
Juventus	46	205	0.944628	21966	9.99725	2136362	14.5746	0	21203.9	29155.4	10.2804	0	1	2	0.0357143	1933	78	0	Italy	Soccer	2011	0	0	0	0	0	0	0	1	0	1	0	2984300	14.9089	94000	11.4511
Atletico de Madrid	0	153	0.705015	41526	10.6341	6321398	15.6595	1	21027.5	28912.8	10.272	0	1	0	0	1966	45	1	Spain	Soccer	2011	0	0	0	0	0	0	0	0	1	1	0	341300	12.7405	78100	11.2657
Barcelona	104.333	383.667	1.76791	79268	11.2806	4971701	15.4193	0	18597.7	25571.8	10.1492	6	4	4	0.0714286	1957	54	1	Spain	Soccer	2011	0	0	0	0	0	0	0	0	1	1	0	25803000	17.066	2986900	14.9097
Real Madrid	107.667	429.333	1.97834	71289	11.1745	6321398	15.6595	1	21027.5	28912.8	10.272	4	2	9	0.160714	1947	64	1	Spain	Soccer	2011	0	0	0	0	0	0	0	0	1	1	0	24022500	16.9945	3366500	15.0294
Arizona Diamondbacks	6.2	173.8	0.924009	25993	10.1656	4282899	15.2701	3	36833	36833	10.5141	3	0	1	0.00943396	1998	13	0	MLB	baseball	2011	1	0	0	0	0	0	0	0	0	1	0	217300	12.289	28900	10.2716
Atlanta Braves	22.2	178.8	0.950592	30037.2	10.3102	5831778	15.5788	3	39713	39713	10.5894	2	3	1	0.00943396	1997	14	1	MLB	baseball	2011	1	0	0	0	0	0	0	0	0	1	0	1035800	13.8507	120900	11.7027
Baltimore Orioles	25.5	149.5	0.794818	21943.3	9.99622	8440617	15.9486	5	51126	51126	10.842	0	0	3	0.0283019	1992	19	0	MLB	baseball	2011	1	0	0	0	0	0	0	0	0	1	0	330300	12.7078	30950	10.3401
Boston Red Sox	-1.1	273.1	1.45194	37703.7	10.5375	7609358	15.8449	3	57893	57893	10.9664	2	2	7	0.0660377	1912	99	1	MLB	baseball	2011	1	0	0	0	0	0	0	0	0	1	0	3288700	15.006	189300	12.1511
Chicago Cubs	23.4	234.6	1.24725	37258.8	10.5256	9804845	16.0984	4	45977	45977	10.7359	0	1	2	0.0188679	1914	97	1	MLB	baseball	2011	1	0	0	0	0	0	0	0	0	1	0	1514600	14.2307	85400	11.3551
Chicago White Sox	27.6	182.4	0.969731	24705.1	10.1148	9804845	16.0984	4	45977	45977	10.7359	1	2	3	0.0283019	1991	20	0	MLB	baseball	2011	1	0	0	0	0	0	0	0	0	1	0	817400	13.6139	43300	10.6759
Cincinnati Reds	20.1	158.9	0.844793	27328.2	10.2157	2214954	14.6107	1	40918	40918	10.6193	1	3	5	0.0471698	2003	8	0	MLB	baseball	2011	1	0	0	0	0	0	0	0	0	1	0	495100	13.1125	64300	11.0713
Cleveland Indians	12.1	155.9	0.828844	22726.4	10.0313	2891988	14.8775	2	42365	42365	10.6541	1	0	2	0.0188679	1994	17	0	MLB	baseball	2011	1	0	0	0	0	0	0	0	0	1	0	485400	13.0927	38900	10.5687
Colorado Rockies	16.3	171.7	0.912845	35923.2	10.4891	3110436	14.9503	3	48980	48980	10.7992	1	2	0	0	1995	16	0	MLB	baseball	2011	1	0	0	0	0	0	0	0	0	1	0	424700	12.9591	28000	10.24
Detroit Tigers	-29.1	221.1	1.17548	32617.8	10.3926	5327764	15.4884	3	40009	40009	10.5969	4	2	4	0.0377358	2000	11	0	MLB	baseball	2011	1	0	0	0	0	0	0	0	0	1	0	904700	13.7154	45800	10.732
Florida Marlins	20.2	122.8	0.652867	19007	9.85256	5950855	15.599	3	43072	43072	10.6706	0	1	2	0.0188679	1987	24	1	MLB	baseball	2011	1	0	0	0	0	0	0	0	0	1	0	224500	12.3216	23200	10.0519
Houston Astros	14.4	182.6	0.970795	25518.7	10.1472	5968586	15.602	2	47612	47612	10.7708	0	1	0	0	2000	11	0	MLB	baseball	2011	1	0	0	0	0	0	0	0	0	1	0	387400	12.8672	22900	10.0389
Kansas City Royals	10.3	149.7	0.795881	21289.5	9.96597	2136653	14.5748	1	43062	43062	10.6704	0	0	1	0.00943396	1973	38	0	MLB	baseball	2011	1	0	0	0	0	0	0	0	0	1	0	270100	12.5065	37350	10.5281
Los Angeles Angels of Anaheim	11.8	210.2	1.11753	39090.4	10.5736	17820893	16.6959	5	44423	44423	10.7015	2	1	1	0.00943396	1966	45	0	MLB	baseball	2011	1	0	0	0	0	0	0	0	0	1	0	409300	12.9222	36600	10.5078
Los Angeles Dodgers	32.8	213.2	1.13348	36236.3	10.4978	17820893	16.6959	5	44423	44423	10.7015	2	1	5	0.0471698	1962	49	1	MLB	baseball	2011	1	0	0	0	0	0	0	0	0	1	0	882100	13.6901	86300	11.3656
Milwaukee Brewers	12.4	166.6	0.88573	37918.2	10.5432	1760268	14.381	1	44610	44610	10.7057	4	1	1	0.00943396	2001	10	0	MLB	baseball	2011	1	0	0	0	0	0	0	0	0	1	0	544100	13.2069	54500	10.906
Minnesota Twins	26.5	186.5	0.991529	39112.4	10.5742	3604460	15.0977	3	48657	48657	10.7926	0	3	2	0.0188679	2010	1	0	MLB	baseball	2011	1	0	0	0	0	0	0	0	0	1	0	722800	13.4909	58500	10.9768
New York Mets	-6.2	239.2	1.27171	30108.2	10.3126	22232494	16.9171	8	56770	56770	10.9468	1	1	2	0.0188679	2009	2	0	MLB	baseball	2011	1	0	0	0	0	0	0	0	0	1	0	519200	13.16	62600	11.0445
New York Yankees	25.7	401.3	2.13352	45107.2	10.7168	22232494	16.9171	8	56770	56770	10.9468	3	4	27	0.254717	2009	2	1	MLB	baseball	2011	1	0	0	0	0	0	0	0	0	1	0	5020800	15.4291	514500	13.151
Oakland Athletics	23.2	137.8	0.732615	18232	9.81093	7427757	15.8207	5	61395	61395	11.0251	1	2	4	0.0377358	1966	45	0	MLB	baseball	2011	1	0	0	0	0	0	0	0	0	1	0	293600	12.59	29600	10.2955
Philadelphia Phillies	8.9	230.1	1.22333	45441	10.7242	6533122	15.6924	3	48723	48723	10.7939	3	4	2	0.0188679	2004	7	1	MLB	baseball	2011	1	0	0	0	0	0	0	0	0	1	0	1136300	13.9433	667000	13.4105
Pittsburgh Pirates	24.6	135.4	0.719855	24255.4	10.0964	2445117	14.7096	2	44982	44982	10.714	0	0	5	0.0471698	2001	10	0	MLB	baseball	2011	1	0	0	0	0	0	0	0	0	1	0	294800	12.5941	27600	10.2256
San Diego Padres	37.2	121.8	0.647551	26457	10.1833	5009170	15.4268	1	46800	46800	10.7536	0	2	0	0	2004	7	0	MLB	baseball	2011	1	0	0	0	0	0	0	0	0	1	0	351700	12.7705	28200	10.2471
San Francisco Giants	29.9	200.1	1.06383	41818.6	10.6411	7427757	15.8207	5	61395	61395	11.0251	2	6	1	0.00943396	2000	11	1	MLB	baseball	2011	1	0	0	0	0	0	0	0	0	1	0	1284100	14.0656	218800	12.2959
Seattle Mariners	9.9	194.1	1.03193	23411.4	10.061	4158293	15.2406	2	50944	50944	10.8385	0	0	0	0	1999	12	0	MLB	baseball	2011	1	0	0	0	0	0	0	0	0	1	0	455200	13.0285	37200	10.5241
St Louis Cardinals	19.8	187.2	0.995251	38197	10.5505	2892874	14.8778	2	42864	42864	10.6658	6	2	10	0.0943396	2006	5	1	MLB	baseball	2011	1	0	0	0	0	0	0	0	0	1	0	1171900	13.9741	103500	11.5473
Tampa Bay Rays	6.8	159.2	0.846388	18878.9	9.8458	4152238	15.2392	2	39261	39261	10.578	3	3	0	0	1990	21	0	MLB	baseball	2011	1	0	0	0	0	0	0	0	0	1	0	391700	12.8783	44200	10.6965
Texas Rangers	22.6	183.4	0.975048	36382.1	10.5018	6805275	15.7332	3	43708	43708	10.6853	5	5	0	0	1994	17	0	MLB	baseball	2011	1	0	0	0	0	0	0	0	0	1	0	1142800	13.949	110000	11.6082
Toronto Blue Jays	3.6	164.4	0.874034	22445.7	10.0189	5509874	15.5221	2	41700	41700	10.6383	2	2	0	0	1989	22	1	MLB	baseball	2011	1	0	0	0	0	0	0	0	0	1	0	375500	12.836	82000	11.3145
Washington Nationals (ex Montreal)	36.6	157.4	0.836819	24877.9	10.1217	8440617	15.9486	5	59345	59345	10.9911	1	0	0	0	2008	3	1	MLB	baseball	2011	1	0	0	0	0	0	0	0	0	1	0	128600	11.7645	25100	10.1306
Atlanta Hawks	-14.7	123.7	0.980371	15648.7	9.65814	5831778	15.5788	3	39713	39713	10.5894	3	3	0	0	2000	11	1	NBA	Basketball	2011	0	1	0	0	0	0	0	0	0	1	0	208900	12.2496	48800	10.7955
Boston Celtics	7.7	138.3	1.09608	18624	9.83221	7609358	15.8449	3	57893	57893	10.9664	5	3	17	0.265625	1996	15	1	NBA	Basketball	2011	0	1	0	0	0	0	0	0	0	1	0	5895900	15.5898	329700	12.7059
Charlotte Bobcats	-25.5	126.5	1.00256	15846.2	9.67068	2389763	14.6867	2	40223	40223	10.6022	2	1	0	0	2006	5	0	NBA	Basketball	2011	0	1	0	0	0	0	0	0	0	1	0	94100	11.4521	42600	10.6596
Chicago Bulls	59.4	125.6	0.99543	21791.8	9.98929	9804845	16.0984	4	45977	45977	10.7359	2	2	6	0.09375	1995	16	1	NBA	Basketball	2011	0	1	0	0	0	0	0	0	0	1	0	4605000	15.3427	298000	12.6048
Cleveland Cavaliers	32.9	116.1	0.920138	20112.1	9.90908	2891988	14.8775	2	42365	42365	10.6541	3	4	0	0	1995	16	1	NBA	Basketball	2011	0	1	0	0	0	0	0	0	0	1	0	808800	13.6033	89600	11.4031
Dallas Mavericks	-3.9	169.9	1.34652	20101.5	9.90855	6805275	15.7332	3	43708	43708	10.6853	2	3	0	0	2002	9	0	NBA	Basketball	2011	0	1	0	0	0	0	0	0	0	1	0	1928700	14.4724	162900	12.0009
Denver Nuggets	-1.2	114.2	0.90508	16901.7	9.73517	3110436	14.9503	3	48980	48980	10.7992	2	4	0	0	2000	11	1	NBA	Basketball	2011	0	1	0	0	0	0	0	0	0	1	0	698500	13.4567	68800	11.139
Detroit Pistons	9.7	131.3	1.0406	16660.5	9.7208	5327764	15.4884	3	40009	40009	10.5969	0	2	3	0.046875	1989	22	1	NBA	Basketball	2011	0	1	0	0	0	0	0	0	0	1	0	398600	12.8957	52400	10.8667
Golden State Warriors	22.2	116.8	0.925686	18692.6	9.83588	7427757	15.8207	5	61395	61395	11.0251	0	0	1	0.015625	1967	44	0	NBA	Basketball	2011	0	1	0	0	0	0	0	0	0	1	0	301500	12.6165	62800	11.0477
Houston Rockets	17.9	132.1	1.04694	16191.2	9.69222	5968586	15.602	2	47612	47612	10.7708	1	3	2	0.03125	2004	7	0	NBA	Basketball	2011	0	1	0	0	0	0	0	0	0	1	0	464300	13.0483	68200	11.1302
Indiana Pacers	-10.5	111.5	0.883682	13538.5	9.51329	2064870	14.5406	1	40572	40572	10.6108	0	1	0	0	2000	11	0	NBA	Basketball	2011	0	1	0	0	0	0	0	0	0	1	0	134500	11.8093	47900	10.7769
Los Angeles Clippers	9.4	98.6	0.781444	17743	9.78374	17820893	16.6959	5	44423	44423	10.7015	0	0	0	0	2000	11	1	NBA	Basketball	2011	0	1	0	0	0	0	0	0	0	1	0	170900	12.0488	80400	11.2948
Los Angeles Lakers	24.3	183.7	1.4559	18997	9.85204	17820893	16.6959	5	44423	44423	10.7015	6	6	11	0.171875	2000	11	1	NBA	Basketball	2011	0	1	0	0	0	0	0	0	0	1	0	11567100	16.2637	2319700	14.6569
Memphis Grizzlies	-24.8	123.8	0.981164	14650.9	9.59226	1285732	14.0668	0	38622	38622	10.5616	1	0	0	0	1992	19	0	NBA	Basketball	2011	0	1	0	0	0	0	0	0	0	1	0	139000	11.8422	54400	10.9041
Miami Heat	26	132	1.04615	19778.8	9.89236	5950855	15.599	3	43072	43072	10.6706	2	2	1	0.015625	2000	11	0	NBA	Basketball	2011	0	1	0	0	0	0	0	0	0	1	0	4674100	15.3575	413600	12.9327
Milwaukee Bucks	-7.6	99.6	0.789369	15412.4	9.64293	1760268	14.381	1	44610	44610	10.7057	2	1	1	0.015625	1989	22	0	NBA	Basketball	2011	0	1	0	0	0	0	0	0	0	1	0	186100	12.134	42300	10.6525
Minnesota Timberwolves	-6.8	103.8	0.822656	15242.9	9.63187	3604460	15.0977	3	48657	48657	10.7926	0	0	0	0	1991	20	0	NBA	Basketball	2011	0	1	0	0	0	0	0	0	0	1	0	153700	11.9428	48000	10.779
New Jersey Nets	-23.6	112.6	0.8924	14180	9.55958	22232494	16.9171	8	56770	56770	10.9468	0	1	0	0	1982	29	0	NBA	Basketball	2011	0	1	0	0	0	0	0	0	0	1	0	162900	12.0009	78700	11.2734
New Orleans Hornets	-2.7	111.7	0.885267	14709.5	9.59625	1235650	14.0271	1	43603	43603	10.6829	1	2	0	0	1999	12	0	NBA	Basketball	2011	0	1	0	0	0	0	0	0	0	1	0	216600	12.2858	45700	10.7299
New York Knicks	74.9	169.1	1.34018	19728.8	9.88983	22232494	16.9171	8	56770	56770	10.9468	0	0	2	0.03125	1969	42	1	NBA	Basketball	2011	0	1	0	0	0	0	0	0	0	1	0	1406400	14.1565	183100	12.1178
Oklahoma City Thunder (ex Seattle)	24.5	101.5	0.804428	18148	9.80632	2747614	14.8262	0	35535	35535	10.4783	2	0	0	0	2002	9	0	NBA	Basketball	2011	0	1	0	0	0	0	0	0	0	1	0	795300	13.5865	102700	11.5396
Orlando Magic	-16	156	1.23636	18972	9.85072	6533122	15.6924	3	48723	48723	10.7939	4	5	0	0	1990	21	0	NBA	Basketball	2011	0	1	0	0	0	0	0	0	0	1	0	1182900	13.9835	1060000	13.8738
Philadelphia 76ers	-10.3	126.3	1.00098	14751.8	9.59912	4281899	15.2699	3	36833	36833	10.5141	0	2	2	0.03125	1997	14	1	NBA	Basketball	2011	0	1	0	0	0	0	0	0	0	1	0	210800	12.2587	65100	11.0837
Phoenix Suns	13.1	122.9	0.974031	17567	9.77378	2599142	14.7707	0	43960	43960	10.691	4	1	0	0	1993	18	0	NBA	Basketball	2011	0	1	0	0	0	0	0	0	0	1	0	640800	13.3705	90900	11.4175
Portland Trail Blazers	-8.1	140.1	1.11035	20510.3	9.92868	2436109	14.7059	0	40745	40745	10.6151	2	2	1	0.015625	1996	15	1	NBA	Basketball	2011	0	1	0	0	0	0	0	0	0	1	0	353400	12.7754	60500	11.0104
Sacramento Kings	6.4	97.6	0.773519	13890.1	9.53893	2031445	14.5243	0	36781	36781	10.5127	0	0	0	0	1989	22	1	NBA	Basketball	2011	0	1	0	0	0	0	0	0	0	1	0	181300	12.1079	47000	10.7579
San Antonio Spurs	14.4	124.6	0.987504	18314.1	9.81543	4158293	15.2406	2	50944	50944	10.8385	3	2	4	0.0625	2003	8	0	NBA	Basketball	2011	0	1	0	0	0	0	0	0	0	1	0	1051800	13.866	97700	11.4897
Toronto Raptors	7.4	126.6	1.00336	16566	9.71511	5509874	15.5221	2	41700	41700	10.6383	1	1	0	0	2000	11	1	NBA	Basketball	2011	0	1	0	0	0	0	0	0	0	1	0	297500	12.6032	58200	10.9716
Utah Jazz	-16.4	136.4	1.08102	19511.8	9.87877	1743364	14.3713	0	39595	39595	10.5865	3	2	0	0	1992	19	1	NBA	Basketball	2011	0	1	0	0	0	0	0	0	0	1	0	302600	12.6202	61900	11.0333
Washington Wizards	-3.4	112.4	0.890814	16791.9	9.72865	8440617	15.9486	5	59345	59345	10.9911	0	0	0	0	1998	13	0	NBA	Basketball	2011	0	1	0	0	0	0	0	0	0	1	0	131800	11.789	46300	10.7429
Arizona Cardinals	56.4	183.6	0.797643	61181.9	11.0216	4282899	15.2701	3	36833	36833	10.5141	1	3	0	0	2006	5	0	NFL	Football	2011	0	0	0	1	0	0	0	0	0	1	0	408300	12.9198	22300	10.0123
Atlanta Falcons	27.2	205.8	0.89409	68986.5	11.1417	5831778	15.5788	3	39713	39713	10.5894	3	1	0	0	1992	19	0	NFL	Football	2011	0	0	0	1	0	0	0	0	0	1	0	681200	13.4316	105900	11.5703
Baltimore Ravens	24.9	237.1	1.03007	71224	11.1736	8440617	15.9486	5	51126	51126	10.842	3	3	1	0.0111111	1998	13	0	NFL	Football	2011	0	0	0	1	0	0	0	0	0	1	0	911700	13.7231	115700	11.6588
Buffalo Bills	40.9	195.1	0.847604	62694.9	11.046	1203493	14.0007	1	40121	40121	10.5997	1	1	0	0	1973	38	0	NFL	Football	2011	0	0	0	1	0	0	0	0	0	1	0	353700	12.7762	77600	11.2593
Carolina Panthers	31.2	225.8	0.980979	72292.8	11.1885	2389763	14.6867	2	40223	40223	10.6022	0	1	0	0	1996	15	1	NFL	Football	2011	0	0	0	1	0	0	0	0	0	1	0	399800	12.8987	72500	11.1913
Chicago Bears	43.4	222.6	0.967077	62145.8	11.0372	9804845	16.0984	4	45977	45977	10.7359	4	1	9	0.1	1924	87	0	NFL	Football	2011	0	0	0	1	0	0	0	0	0	1	0	2220700	14.6133	125250	11.7381
Cincinnati Bengals	44.7	191.3	0.831095	49251.1	10.8047	2214954	14.6107	1	40918	40918	10.6193	1	2	0	0	2000	11	0	NFL	Football	2011	0	0	0	1	0	0	0	0	0	1	0	550800	13.2191	86000	11.3621
Cleveland Browns	-2.9	249.9	1.08568	65859.2	11.0953	2891988	14.8775	2	42365	42365	10.6541	1	1	4	0.0444444	1999	12	0	NFL	Football	2011	0	0	0	1	0	0	0	0	0	1	0	529300	13.1793	78200	11.267
Dallas Cowboys	119	287	1.24686	85512	11.3564	6805275	15.7332	3	43708	43708	10.6853	1	3	5	0.0555556	2009	2	0	NFL	Football	2011	0	0	0	1	0	0	0	0	0	1	0	4299600	15.274	269100	12.5028
Denver Broncos	28.5	226.5	0.984021	75327.2	11.2296	3110436	14.9503	3	48980	48980	10.7992	1	1	2	0.0222222	2001	10	0	NFL	Football	2011	0	0	0	1	0	0	0	0	0	1	0	1087200	13.8991	130800	11.7814
Detroit Lions	-7.7	235.7	1.02399	63742.5	11.0626	5327764	15.4884	3	40009	40009	10.5969	1	0	4	0.0444444	2002	9	0	NFL	Football	2011	0	0	0	1	0	0	0	0	0	1	0	665600	13.4084	120500	11.6994
Green Bay Packers	12	247	1.07308	70512.1	11.1635	279485	12.5407	0	39046	39046	10.5725	6	2	12	0.133333	1957	54	0	NFL	Football	2011	0	0	0	1	0	0	0	0	0	1	0	2629700	14.7824	232300	12.3558
Houston Texans	41	242	1.05136	71496.1	11.1774	5968586	15.602	2	47612	47612	10.7708	1	1	0	0	2002	9	0	NFL	Football	2011	0	0	0	1	0	0	0	0	0	1	0	530000	13.1806	97200	11.4845
Indianapolis Colts	32.8	219.2	0.952306	64828.4	11.0795	2064870	14.5406	1	40572	40572	10.6108	2	5	1	0.0111111	2008	3	0	NFL	Football	2011	0	0	0	1	0	0	0	0	0	1	0	1554850	14.2569	66400	11.1035
Jacksonville Jaguars	32.8	203.2	0.882795	62331.9	11.0402	1313228	14.088	0	40709	40709	10.6142	1	1	0	0	1995	16	0	NFL	Football	2011	0	0	0	1	0	0	0	0	0	1	0	238200	12.3809	41500	10.6334
Kansas City Chiefs	14.5	237.5	1.03181	72082.4	11.1856	2136653	14.5748	1	43062	43062	10.6704	2	1	1	0.0111111	1972	39	0	NFL	Football	2011	0	0	0	1	0	0	0	0	0	1	0	574800	13.2618	75700	11.2345
Miami Dolphins	12.9	240.1	1.04311	60886.1	11.0168	5950855	15.599	3	43072	43072	10.6706	1	1	2	0.0222222	1987	24	1	NFL	Football	2011	0	0	0	1	0	0	0	0	0	1	0	1033300	13.8483	115100	11.6536
Minnesota Vikings	3.7	223.3	0.970118	62816.1	11.048	3604460	15.0977	3	48657	48657	10.7926	1	4	0	0	1982	29	0	NFL	Football	2011	0	0	0	1	0	0	0	0	0	1	0	1254300	14.0421	104350	11.5555
New England Patriots	42.9	290.1	1.26033	68756	11.1383	7609358	15.8449	3	57893	57893	10.9664	3	2	3	0.0333333	2002	9	1	NFL	Football	2011	0	0	0	1	0	0	0	0	0	1	0	3046500	14.9295	305300	12.6291
New Orleans Saints	28.9	232.1	1.00835	73042	11.1988	1235650	14.0271	1	43603	43603	10.6829	2	6	1	0.0111111	1975	36	0	NFL	Football	2011	0	0	0	1	0	0	0	0	0	1	0	2416900	14.698	176900	12.0833
New York Giants	40.6	252.4	1.09654	79475	11.2832	22232494	16.9171	8	56770	56770	10.9468	1	1	7	0.0777778	2010	1	0	NFL	Football	2011	0	0	0	1	0	0	0	0	0	1	0	1617700	14.2965	218900	12.2964
New York Jets	25.1	259.9	1.12913	78986	11.277	22232494	16.9171	8	56770	56770	10.9468	4	4	1	0.0111111	2010	1	0	NFL	Football	2011	0	0	0	1	0	0	0	0	0	1	0	1162800	13.9663	306800	12.634
Oakland Raiders	23	194	0.842826	59242.2	10.9894	7427757	15.8207	5	61395	61395	11.0251	1	1	3	0.0333333	1966	45	0	NFL	Football	2011	0	0	0	1	0	0	0	0	0	1	0	1408900	14.1583	143400	11.8734
Philadelphia Eagles	28.9	245.1	1.06483	69144	11.1439	6533122	15.6924	3	48723	48723	10.7939	2	2	3	0.0333333	2003	8	0	NFL	Football	2011	0	0	0	1	0	0	0	0	0	1	0	1583000	14.2748	160100	11.9836
Pittsburgh Steelers	28.3	226.7	0.984889	63034.9	11.0514	2445117	14.7096	2	44982	44982	10.714	5	1	6	0.0666667	2001	10	0	NFL	Football	2011	0	0	0	1	0	0	0	0	0	1	0	3983800	15.1977	275000	12.5245
San Diego Chargers	34.2	206.8	0.898435	65392.9	11.0882	5009170	15.4268	1	46800	46800	10.7536	1	3	0	0	1967	44	0	NFL	Football	2011	0	0	0	1	0	0	0	0	0	1	0	1024900	13.8401	121400	11.7068
San Francisco 49ers	1.5	232.5	1.01009	69732	11.1524	7427757	15.8207	5	61395	61395	11.0251	1	1	5	0.0555556	1960	51	0	NFL	Football	2011	0	0	0	1	0	0	0	0	0	1	0	1158400	13.9626	162500	11.9984
Seattle Seahawks	7.8	241.2	1.04788	66413.9	11.1037	4158293	15.2406	2	50944	50944	10.8385	3	1	0	0	2002	9	0	NFL	Football	2011	0	0	0	1	0	0	0	0	0	1	0	646300	13.379	73400	11.2037
St Louis Rams	24.6	203.4	0.883663	56394.1	10.9401	2892874	14.8778	2	42864	42864	10.6658	1	0	1	0.0111111	1995	16	0	NFL	Football	2011	0	0	0	1	0	0	0	0	0	1	0	283900	12.5564	54000	10.8967
Tampa Bay Buccaneers	50.8	194.2	0.843694	56614.3	10.944	4152238	15.2392	2	39261	39261	10.578	1	0	1	0.0111111	1998	13	0	NFL	Football	2011	0	0	0	1	0	0	0	0	0	1	0	418300	12.944	57200	10.9543
Tennessee Titans	21.8	228.2	0.991406	69143	11.1439	1666566	14.3263	1	42129	42129	10.6485	1	1	0	0	1999	12	0	NFL	Football	2011	0	0	0	1	0	0	0	0	0	1	0	439200	12.9927	71300	11.1747
Washington Redskins	65.6	286.4	1.24425	76921	11.2505	8440617	15.9486	5	59345	59345	10.9911	1	1	5	0.0555556	1997	14	1	NFL	Football	2011	0	0	0	1	0	0	0	0	0	1	0	855600	13.6596	83500	11.3326
Boston Bruins	2.7	122.3	1.22838	17565	9.77366	7609358	15.8449	3	57893	57893	10.9664	6	3	6	0.0659341	1996	15	1	NHL	Hockey	2011	0	0	1	0	0	0	0	0	0	1	0	1091500	13.9031	143900	11.8769
Buffalo Sabres	-5.6	92.6	0.930073	18452.9	9.82298	1203493	14.0007	1	40121	40121	10.5997	2	2	0	0	1997	14	0	NHL	Hockey	2011	0	0	1	0	0	0	0	0	0	1	0	307100	12.6349	61100	11.0203
Calgary Flames	1.1	103.9	1.04357	19289	9.86729	1139126	13.9458	0	52400	52400	10.8667	1	1	1	0.010989	1983	28	0	NHL	Hockey	2011	0	0	1	0	0	0	0	0	0	1	0	157800	11.9691	86100	11.3633
Carolina Hurricanes	-4.4	85.4	0.857756	16415.3	9.70597	2389763	14.6867	2	40223	40223	10.6022	1	1	1	0.010989	2000	11	0	NHL	Hockey	2011	0	0	1	0	0	0	0	0	0	1	0	152600	11.9356	38200	10.5506
Chicago Black Hawks	8.7	109.3	1.09781	21423.3	9.97224	9804845	16.0984	4	45977	45977	10.7359	2	6	4	0.043956	1995	16	1	NHL	Hockey	2011	0	0	1	0	0	0	0	0	0	1	0	1051500	13.8657	137400	11.8307
Colorado Avalanche	6.1	76.9	0.772383	14820.7	9.60378	3110436	14.9503	3	48980	48980	10.7992	0	2	2	0.021978	2000	11	1	NHL	Hockey	2011	0	0	1	0	0	0	0	0	0	1	0	341800	12.742	46500	10.7472
Columbus Blue Jackets	-13.7	93.7	0.941121	13658.8	9.52214	2031229	14.5242	0	40188	40188	10.6013	1	1	0	0	1983	28	1	NHL	Hockey	2011	0	0	1	0	0	0	0	0	0	1	0	65400	11.0883	35700	10.4829
Dallas Stars	-1.1	91.1	0.915007	15073.1	9.62067	6805275	15.7332	3	43708	43708	10.6853	1	1	1	0.010989	2002	9	0	NHL	Hockey	2011	0	0	1	0	0	0	0	0	0	1	0	143200	11.872	43700	10.6851
Detroit Red Wings	16.3	110.7	1.11187	19680.3	9.88737	5327764	15.4884	3	40009	40009	10.5969	3	3	11	0.120879	1980	31	0	NHL	Hockey	2011	0	0	1	0	0	0	0	0	0	1	0	1188300	13.988	128500	11.7637
Ducks of Anaheim	-8.4	92.4	0.928064	14738.6	9.59823	17820893	16.6959	5	44423	44423	10.7015	2	1	1	0.010989	1994	17	0	NHL	Hockey	2011	0	0	1	0	0	0	0	0	0	1	0	171400	12.0518	43700	10.6851
Edmonton Oilers	17.3	78.7	0.790462	16839	9.73145	1081275	13.8937	0	45400	45400	10.7233	0	0	5	0.0549451	1975	36	1	NHL	Hockey	2011	0	0	1	0	0	0	0	0	0	1	0	197600	12.194	105800	11.5693
Florida Panthers	-7	88	0.883871	15685.8	9.66051	5950855	15.599	3	43072	43072	10.6706	1	1	0	0	1999	12	0	NHL	Hockey	2011	0	0	1	0	0	0	0	0	0	1	0	64800	11.0791	31800	10.3672
Los Angeles Kings	-2	103	1.03453	18083	9.80273	17820893	16.6959	5	44423	44423	10.7015	2	2	0	0	2000	11	1	NHL	Hockey	2011	0	0	1	0	0	0	0	0	0	1	0	186000	12.1335	59200	10.9887
Minnesota Wild	-5.9	102.9	1.03353	18012.7	9.79883	3604460	15.0977	3	48657	48657	10.7926	1	1	0	0	2001	10	0	NHL	Hockey	2011	0	0	1	0	0	0	0	0	0	1	0	154900	11.9505	49900	10.8178
Montreal Canadiens	47.7	117.3	1.17816	21273	9.96519	3859318	15.166	0	36600	36600	10.5078	2	4	24	0.263736	1997	14	1	NHL	Hockey	2011	0	0	1	0	0	0	0	0	0	1	0	938500	13.752	236700	12.3745
Nashville Predators	-7.5	89.5	0.898937	16143	9.68924	1666566	14.3263	1	42129	42129	10.6485	3	2	0	0	1997	14	0	NHL	Hockey	2011	0	0	1	0	0	0	0	0	0	1	0	93500	11.4457	41300	10.6286
New Jersey Devils	-6.1	106.1	1.06567	14775.7	9.60074	22232494	16.9171	8	56770	56770	10.9468	2	2	3	0.032967	2007	4	0	NHL	Hockey	2011	0	0	1	0	0	0	0	0	0	1	0	250200	12.43	50900	10.8376
New York Islanders	-8.1	71.1	0.714127	11059.9	9.31108	22232494	16.9171	8	56770	56770	10.9468	1	1	4	0.043956	1973	38	0	NHL	Hockey	2011	0	0	1	0	0	0	0	0	0	1	0	58100	10.9699	33100	10.4073
New York Rangers	41.4	127.6	1.28161	18108.1	9.80411	22232494	16.9171	8	56770	56770	10.9468	2	1	4	0.043956	1969	42	1	NHL	Hockey	2011	0	0	1	0	0	0	0	0	0	1	0	421400	12.9513	90100	11.4087
Ottawa Senators	2.8	97.2	0.976275	18378.7	9.81895	1168788	13.9715	0	47700	47700	10.7727	1	2	0	0	1996	15	1	NHL	Hockey	2011	0	0	1	0	0	0	0	0	0	1	0	120100	11.6961	43600	10.6828
Philadelphia Flyers	3.2	107.8	1.08274	19715.3	9.88915	6533122	15.6924	3	48723	48723	10.7939	3	5	2	0.021978	1997	14	1	NHL	Hockey	2011	0	0	1	0	0	0	0	0	0	1	0	718300	13.4846	114200	11.6457
Phoenix Coyotes	-24.4	94.4	0.948152	12188.6	9.40825	4281899	15.2699	3	36833	36833	10.5141	2	2	0	0	2004	7	0	NHL	Hockey	2011	0	0	1	0	0	0	0	0	0	1	0	79500	11.2835	30400	10.3222
Pittsburgh Penguins	-0.2	110.2	1.10685	18240.7	9.81141	2445117	14.7096	2	44982	44982	10.714	2	3	3	0.032967	1962	49	0	NHL	Hockey	2011	0	0	1	0	0	0	0	0	0	1	0	1089200	13.901	169800	12.0424
San Jose Sharks	-7.8	103.8	1.04257	17562	9.77349	7427757	15.8207	5	61028	61028	11.0191	4	4	0	0	1994	17	0	NHL	Hockey	2011	0	0	1	0	0	0	0	0	0	1	0	421200	12.9509	67000	11.1124
St Louis Blues	-2.7	80.7	0.81055	19150	9.86006	2892874	14.8778	2	42864	42864	10.6658	1	1	0	0	1995	16	0	NHL	Hockey	2011	0	0	1	0	0	0	0	0	0	1	0	146000	11.8914	56600	10.9438
Tampa Bay Lightning	-8.5	95.5	0.959201	17268.8	9.75666	4152238	15.2392	2	39261	39261	10.578	4	1	1	0.010989	1997	14	1	NHL	Hockey	2011	0	0	1	0	0	0	0	0	0	1	0	221400	12.3077	50700	10.8337
Toronto Maple Leafs	81.8	111.2	1.11689	19354.2	9.87066	5509874	15.5221	2	41700	41700	10.6383	1	1	11	0.120879	2000	11	1	NHL	Hockey	2011	0	0	1	0	0	0	0	0	0	1	0	533600	13.1874	130500	11.7791
Vancouver Canucks	23.5	122.5	1.23039	18860	9.8448	2374628	14.6804	0	37800	37800	10.5401	5	3	0	0	1996	15	1	NHL	Hockey	2011	0	0	1	0	0	0	0	0	0	1	0	682800	13.434	219350	12.2984
Washington Capitals	-7.5	101.5	1.01946	18397.8	9.81999	8440617	15.9486	5	59345	59345	10.9911	3	2	0	0	1998	13	1	NHL	Hockey	2011	0	0	1	0	0	0	0	0	0	1	0	426000	12.9622	81700	11.3108
Arsenal	98	266	0.969211	60000	11.0021	12448448	16.3371	2	26762	34405.2	10.446	2	2	0	0	2006	6	1	England	Soccer	2012	0	0	0	0	1	0	0	0	0	0	1	12837076	16.3678	2136670	14.5748
Chelsea	76	286	1.04208	41478	10.6329	12448448	16.3371	2	26762	34405.2	10.446	6	3	0	0	1877	135	1	England	Soccer	2012	0	0	0	0	1	0	0	0	0	0	1	15428098	16.5517	1815977	14.4121
Liverpool	45	250	0.910913	44253	10.6977	5327077	15.4883	2	15011.6	19298.9	9.8678	0	0	5	0.0877193	1884	128	1	England	Soccer	2012	0	0	0	0	1	0	0	0	0	0	1	11266018	16.2373	1483690	14.21
Manchester City	-123	369	1.34451	47045	10.7589	5327077	15.4883	2	15011.6	19298.9	9.8678	1	0	0	0	2002	10	0	England	Soccer	2012	0	0	0	0	1	0	0	0	0	0	1	4582312	15.3377	700463	13.4595
Manchester United	178	354	1.28985	75387	11.2304	5327077	15.4883	2	15011.6	19298.9	9.8678	1	5	3	0.0526316	1910	102	1	England	Soccer	2012	0	0	0	0	1	0	0	0	0	0	1	30982710	17.2489	89406	0
Tottenham Hotspur	60	202	0.736017	36026	10.492	12448448	16.3371	2	26762	34405.2	10.446	0	3	0	0	1899	113	1	England	Soccer	2012	0	0	0	0	1	0	0	0	0	0	1	1594453	14.282	339000	12.7338
Olympique Lyonnais	-3	196	0.714156	33067	10.4063	1771459	14.3873	0	21939.2	28205	10.2473	2	2	0	0	1920	92	0	France	Soccer	2012	0	0	0	0	0	1	0	0	0	0	1	726176	13.4955	68120	11.129
Olympique Marseille	17	201	0.732374	40445	10.6077	1621766	14.299	0	19927.5	25618.8	10.1511	3	2	1	0.0175439	1937	75	0	France	Soccer	2012	0	0	0	0	0	1	0	0	0	0	1	2335185	14.6636	509853	13.1419
Bayern Munich	90	376	1.37001	69000	11.1419	2312477	14.6538	0	24718	31777.5	10.3665	5	2	4	0.0701754	2005	7	1	Germany	Soccer	2012	0	0	0	0	0	0	1	0	0	0	1	5934117	15.5962	128422	11.7631
Borussia Dortmund	33	164	0.597559	80521	11.2963	11316429	16.2418	1	22723.3	29213.1	10.2824	1	0	1	0.0175439	1974	38	1	Germany	Soccer	2012	0	0	0	0	0	0	1	0	0	0	1	1927923	14.472	148247	11.9066
Hamburg SV	17	170	0.619421	53465	10.8868	3266896	14.9994	0	28818.2	37048.7	10.52	0	0	1	0.0175439	1953	59	1	Germany	Soccer	2012	0	0	0	0	0	0	1	0	0	0	1	393868	12.8838	63579	11.06
Schalke 04	101	192	0.699581	61218	11.0222	11316429	16.2418	1	22723.3	29213.1	10.2824	0	4	0	0	2001	11	1	Germany	Soccer	2012	0	0	0	0	0	0	1	0	0	0	1	640997	13.3708	61367	11.0246
AC Milan	29	312	1.13682	49020	10.8	7123563	15.7789	1	23411.8	30098.2	10.3122	3	2	7	0.122807	1926	86	0	Italy	Soccer	2012	0	0	0	0	0	0	0	1	0	0	1	13868402	16.4451	865808	13.6714
AS Roma	2	206	0.750592	36219	10.4973	4185330	15.2471	0	20340	26149.1	10.1716	0	2	0	0	1953	59	0	Italy	Soccer	2012	0	0	0	0	0	0	0	1	0	0	1	1436013	14.1774	136120	11.8213
Internazionale Milan	-84	391	1.42467	44806	10.7101	7123563	15.7789	1	23411.8	30098.2	10.3122	2	3	3	0.0526316	1926	86	0	Italy	Soccer	2012	0	0	0	0	0	0	0	1	0	0	1	174223	12.0681	180188	12.1018
Juventus	-38	261	0.950993	37545	10.5333	2136362	14.5746	0	21203.9	27259.7	10.2132	0	0	2	0.0350877	1933	79	0	Italy	Soccer	2012	0	0	0	0	0	0	0	1	0	0	1	4766838	15.3772	422603	12.9542
Napoli	58	109	0.397158	39808	10.5918	3917763	15.181	0	12103.6	15560.4	9.65248	2	0	0	0	1959	53	0	Italy	Soccer	2012	0	0	0	0	0	0	0	1	0	0	1	721241	13.4887	57931	10.967
Barcelona	96	557	2.02951	75844	11.2364	4971701	15.4193	0	18597.7	23909.2	10.082	4	6	4	0.0701754	1957	55	1	Spain	Soccer	2012	0	0	0	0	0	0	0	0	1	0	1	39793279	17.4992	8015372	15.8969
Real Madrid	214	481	1.7526	74564	11.2194	6321398	15.6595	1	21027.5	27033	10.2048	4	4	9	0.157895	1947	65	1	Spain	Soccer	2012	0	0	0	0	0	0	0	0	1	0	1	35501340	17.3851	6690062	15.7161
Valencia	23	146	0.531973	38263	10.5522	1759485	14.3805	0	13876.1	17839.1	9.78915	1	2	0	0	1923	89	1	Spain	Soccer	2012	0	0	0	0	0	0	0	0	1	0	1	297676	12.6038	225907	12.3279
Arizona Diamondbacks	27.2	158.8	0.803766	26884.2	10.1993	4282899	15.2701	3	36833	36833	10.5141	2	3	1	0.00900901	1998	14	0	MLB	baseball	2012	1	0	0	0	0	0	0	0	0	0	1	280478	12.5443	65083	11.0834
Atlanta Braves	20.7	182.3	0.922711	29878.7	10.3049	5831778	15.5788	3	39713	39713	10.5894	2	2	1	0.00900901	1997	15	1	MLB	baseball	2012	1	0	0	0	0	0	0	0	0	0	1	1256772	14.0441	266838	12.4944
Baltimore Orioles	12.9	166.1	0.840715	26610.6	10.1891	8440617	15.9486	5	51126	51126	10.842	3	0	3	0.027027	1992	20	0	MLB	baseball	2012	1	0	0	0	0	0	0	0	0	0	1	438294	12.9906	108927	11.5984
Boston Red Sox	25.4	284.6	1.4405	37567.9	10.5339	7609358	15.8449	3	57893	57893	10.9664	0	2	7	0.0630631	1912	100	1	MLB	baseball	2012	1	0	0	0	0	0	0	0	0	0	1	3758721	15.1396	358873	12.7907
Chicago Cubs	28.1	237.9	1.20413	35589.6	10.4798	9804845	16.0984	4	45977	45977	10.7359	0	0	2	0.018018	1914	98	1	MLB	baseball	2012	1	0	0	0	0	0	0	0	0	0	1	1740606	14.3697	189895	12.1542
Chicago White Sox	10.7	203.3	1.029	24271	10.097	9804845	16.0984	4	45977	45977	10.7359	2	1	3	0.027027	1991	21	0	MLB	baseball	2012	1	0	0	0	0	0	0	0	0	0	1	957026	13.7716	110174	11.6098
Cincinnati Reds	17.1	167.9	0.849825	28978.4	10.2743	2214954	14.6107	1	40918	40918	10.6193	3	1	5	0.045045	2003	9	0	MLB	baseball	2012	1	0	0	0	0	0	0	0	0	0	1	628724	13.3514	160202	11.9842
Cleveland Indians	30.1	147.9	0.748595	19797.5	9.89331	2891988	14.8775	2	42365	42365	10.6541	0	1	2	0.018018	1994	18	0	MLB	baseball	2012	1	0	0	0	0	0	0	0	0	0	1	556604	13.2296	90774	11.4161
Colorado Rockies	14.4	178.6	0.903983	32474.8	10.3882	3110436	14.9503	3	48980	48980	10.7992	0	1	0	0	1995	17	0	MLB	baseball	2012	1	0	0	0	0	0	0	0	0	0	1	494215	13.1107	65904	11.096
Detroit Tigers	8.2	208.8	1.05684	37383.1	10.529	5327764	15.4884	3	40009	40009	10.5969	5	4	4	0.036036	2000	12	0	MLB	baseball	2012	1	0	0	0	0	0	0	0	0	0	1	1154626	13.9593	204390	12.2278
Florida Marlins	24.3	171.7	0.869059	27400.5	10.2183	5950855	15.599	3	43072	43072	10.6706	0	0	2	0.018018	1987	25	1	MLB	baseball	2012	1	0	0	0	0	0	0	0	0	0	1	300067	12.6118	71207	11.1733
Houston Astros	28.5	132.5	0.670648	19848.6	9.89589	5968586	15.602	2	47612	47612	10.7708	0	0	0	0	2000	12	0	MLB	baseball	2012	1	0	0	0	0	0	0	0	0	0	1	443235	13.0019	61152	11.0211
Kansas City Royals	-1.2	227.2	1.14997	21748.2	9.98729	2136653	14.5748	1	43062	43062	10.6704	0	0	1	0.00900901	1973	39	0	MLB	baseball	2012	1	0	0	0	0	0	0	0	0	0	1	311479	12.6491	84525	11.3448
Los Angeles Angels of Anaheim	1.2	228.8	1.15807	37799.6	10.5401	17820893	16.6959	5	44423	44423	10.7015	2	2	1	0.00900901	1966	46	0	MLB	baseball	2012	1	0	0	0	0	0	0	0	0	0	1	539131	13.1977	85456	11.3558
Los Angeles Dodgers	8.9	139.1	0.704054	41040.1	10.6223	17820893	16.6959	5	44423	44423	10.7015	2	2	5	0.045045	1962	50	1	MLB	baseball	2012	1	0	0	0	0	0	0	0	0	0	1	1233663	14.0255	226572	12.3308
Milwaukee Brewers	19.2	175.8	0.889811	34955.4	10.4618	1760268	14.381	1	44610	44610	10.7057	2	4	1	0.00900901	2001	11	0	MLB	baseball	2012	1	0	0	0	0	0	0	0	0	0	1	618567	13.3352	108981	11.5989
Minnesota Twins	16.6	196.4	0.994078	34276	10.4422	3604460	15.0977	3	48657	48657	10.7926	0	0	2	0.018018	2010	2	0	MLB	baseball	2012	1	0	0	0	0	0	0	0	0	0	1	791383	13.5815	12002	9.39283
New York Mets	-40.8	265.8	1.34535	28035	10.2412	22232494	16.9171	8	56770	56770	10.9468	1	1	2	0.018018	2009	3	0	MLB	baseball	2012	1	0	0	0	0	0	0	0	0	0	1	617400	13.3333	147437	11.9012
New York Yankees	10	429	2.17138	43733.4	10.6859	22232494	16.9171	8	56770	56770	10.9468	4	3	27	0.243243	2009	3	1	MLB	baseball	2012	1	0	0	0	0	0	0	0	0	0	1	6247977	15.6478	805636	13.5994
Oakland Athletics	14.6	145.4	0.735942	20728.6	9.93927	7427757	15.8207	5	61395	61395	11.0251	3	1	4	0.036036	1966	46	0	MLB	baseball	2012	1	0	0	0	0	0	0	0	0	0	1	366218	12.811	86818	11.3716
Philadelphia Phillies	-11.6	260.6	1.31903	44021.2	10.6924	6533122	15.6924	3	48723	48723	10.7939	2	3	2	0.018018	2004	8	1	MLB	baseball	2012	1	0	0	0	0	0	0	0	0	0	1	1265120	14.0507	729870	13.5006
Pittsburgh Pirates	15.9	152.1	0.769854	26149	10.1716	2445117	14.7096	2	44982	44982	10.714	1	0	5	0.045045	2001	11	0	MLB	baseball	2012	1	0	0	0	0	0	0	0	0	0	1	385685	12.8628	97053	11.483
San Diego Padres	23.2	139.8	0.707597	26218.8	10.1742	5009170	15.4268	1	46800	46800	10.7536	1	0	0	0	2004	8	0	MLB	baseball	2012	1	0	0	0	0	0	0	0	0	0	1	396625	12.8907	60983	11.0184
San Francisco Giants	8.8	221.2	1.1196	41695.9	10.6382	7427757	15.8207	5	61395	61395	11.0251	6	2	2	0.018018	2000	12	1	MLB	baseball	2012	1	0	0	0	0	0	0	0	0	0	1	1655084	14.3194	381141	12.8509
Seattle Mariners	2.2	207.8	1.05178	21258.3	9.9645	4158293	15.2406	2	50944	50944	10.8385	1	0	0	0	1999	13	0	MLB	baseball	2012	1	0	0	0	0	0	0	0	0	0	1	528212	13.1773	87333	11.3775
St Louis Cardinals	25	208	1.05279	40273	10.6034	2892874	14.8778	2	42864	42864	10.6658	4	6	10	0.0900901	2006	6	1	MLB	baseball	2012	1	0	0	0	0	0	0	0	0	0	1	1371521	14.1314	234329	12.3645
Tampa Bay Rays	26.2	134.8	0.68229	19255.3	9.86554	4152238	15.2392	2	39261	39261	10.578	2	3	0	0	1990	22	0	MLB	baseball	2012	1	0	0	0	0	0	0	0	0	0	1	445934	13.0079	90081	11.4085
Texas Rangers	15.3	217.7	1.10189	42719.5	10.6624	6805275	15.7332	3	43708	43708	10.6853	2	5	0	0	1994	18	0	MLB	baseball	2012	1	0	0	0	0	0	0	0	0	0	1	1433888	14.1759	238691	12.3829
Toronto Blue Jays	24.9	163.1	0.82553	25921.8	10.1628	5509874	15.5221	2	41700	41700	10.6383	1	2	0	0	1989	23	1	MLB	baseball	2012	1	0	0	0	0	0	0	0	0	0	1	481804	13.0853	210848	12.2589
Washington Nationals (ex Montreal)	25.9	174.1	0.881207	30010.1	10.3093	8440617	15.9486	5	59345	59345	10.9911	3	1	0	0	2008	4	1	MLB	baseball	2012	1	0	0	0	0	0	0	0	0	0	1	207859	12.2446	94082	11.4519
Atlanta Hawks	-18.7	117.7	1.06224	15199.8	9.62904	5831778	15.5788	3	39713	39713	10.5894	2	3	0	0	2000	12	1	NBA	Basketball	2012	0	1	0	0	0	0	0	0	0	0	1	293651	12.5901	112267	11.6286
Boston Celtics	18.7	124.3	1.12181	18624	9.83221	7609358	15.8449	3	57893	57893	10.9664	4	5	17	0.261538	1996	16	1	NBA	Basketball	2012	0	1	0	0	0	0	0	0	0	0	1	6880198	15.7442	945419	13.7594
Charlotte Bobcats	-13.3	106.3	0.959357	14757.1	9.59948	2389763	14.6867	2	40223	40223	10.6022	0	2	0	0	2006	6	0	NBA	Basketball	2012	0	1	0	0	0	0	0	0	0	0	1	155244	11.9528	101975	11.5325
Chicago Bulls	34.2	127.8	1.15339	22161.4	10.0061	9804845	16.0984	4	45977	45977	10.7359	2	2	6	0.0923077	1995	17	1	NBA	Basketball	2012	0	1	0	0	0	0	0	0	0	0	1	8053331	15.9016	656275	13.3943
Cleveland Cavaliers	18.6	109.4	0.987335	15926.6	9.67574	2891988	14.8775	2	42365	42365	10.6541	0	3	0	0	1995	17	1	NBA	Basketball	2012	0	1	0	0	0	0	0	0	0	0	1	932142	13.7452	158539	11.9738
Dallas Mavericks	13	124	1.1191	20334.8	9.92009	6805275	15.7332	3	43708	43708	10.6853	2	2	0	0	2002	10	0	NBA	Basketball	2012	0	1	0	0	0	0	0	0	0	0	1	2465980	14.7181	270254	12.5071
Denver Nuggets	12	98	0.88445	17029.3	9.74269	3110436	14.9503	3	48980	48980	10.7992	2	2	0	0	2000	12	1	NBA	Basketball	2012	0	1	0	0	0	0	0	0	0	0	1	915080	13.7268	146216	11.8928
Detroit Pistons	7.7	117.3	1.05863	14413.3	9.5759	5327764	15.4884	3	40009	40009	10.5969	0	0	3	0.0461538	1989	23	1	NBA	Basketball	2012	0	1	0	0	0	0	0	0	0	0	1	462834	13.0451	122010	11.7119
Golden State Warriors	29.1	97.9	0.883547	18857.9	9.84469	7427757	15.8207	5	61395	61395	11.0251	0	0	1	0.0153846	1967	45	0	NBA	Basketball	2012	0	1	0	0	0	0	0	0	0	0	1	392027	12.8791	155368	11.9536
Houston Rockets	26.6	108.4	0.97831	15363.5	9.63975	5968586	15.602	2	47612	47612	10.7708	1	1	2	0.0307692	2004	8	0	NBA	Basketball	2012	0	1	0	0	0	0	0	0	0	0	1	633628	13.3592	166091	12.0203
Indiana Pacers	10.9	87.1	0.786077	14168.5	9.55878	2064870	14.5406	1	40572	40572	10.6108	3	0	0	0	2000	12	0	NBA	Basketball	2012	0	1	0	0	0	0	0	0	0	0	1	218019	12.2923	130788	11.7813
Los Angeles Clippers	9.1	98.9	0.892572	19219.3	9.86367	17820893	16.6959	5	44423	44423	10.7015	3	0	0	0	2000	12	1	NBA	Basketball	2012	0	1	0	0	0	0	0	0	0	0	1	646814	13.3798	237641	12.3785
Los Angeles Lakers	47.8	149.2	1.34653	18997	9.85204	17820893	16.6959	5	44423	44423	10.7015	3	6	11	0.169231	2000	12	1	NBA	Basketball	2012	0	1	0	0	0	0	0	0	0	0	1	15896874	16.5816	2942520	14.8948
Memphis Grizzlies	-12.5	108.5	0.979212	15704.7	9.66172	1285732	14.0668	0	38622	38622	10.5616	2	1	0	0	1992	20	0	NBA	Basketball	2012	0	1	0	0	0	0	0	0	0	0	1	210112	12.2554	126532	11.7483
Miami Heat	14.9	135.1	1.21928	19935	9.90023	5950855	15.599	3	43072	43072	10.6706	6	2	2	0.0307692	2000	12	0	NBA	Basketball	2012	0	1	0	0	0	0	0	0	0	0	1	7465511	15.8258	1026937	13.8421
Milwaukee Bucks	-0.5	87.5	0.789687	14718.7	9.59687	1760268	14.381	1	44610	44610	10.7057	1	2	1	0.0153846	1989	23	0	NBA	Basketball	2012	0	1	0	0	0	0	0	0	0	0	1	245718	12.4119	103677	11.549
Minnesota Timberwolves	-4.5	100.5	0.907012	17490.8	9.76943	3604460	15.0977	3	48657	48657	10.7926	0	0	0	0	1991	21	0	NBA	Basketball	2012	0	1	0	0	0	0	0	0	0	0	1	265540	12.4895	132671	11.7956
New Jersey Nets	-16.6	100.6	0.907915	13961.2	9.54404	22232494	16.9171	8	56770	56770	10.9468	0	0	0	0	1982	30	0	NBA	Basketball	2012	0	1	0	0	0	0	0	0	0	0	1	771778	13.5565	220039	12.3016
New Orleans Hornets	3.3	96.7	0.872717	15109.6	9.62309	1235650	14.0271	1	43603	43603	10.6829	0	1	0	0	1999	13	0	NBA	Basketball	2012	0	1	0	0	0	0	0	0	0	0	1	302599	12.6202	112476	11.6305
New York Knicks	83.2	159.8	1.44219	19763	9.89157	22232494	16.9171	8	56770	56770	10.9468	2	0	2	0.0307692	1969	43	1	NBA	Basketball	2012	0	1	0	0	0	0	0	0	0	0	1	3404960	15.0407	507101	13.1365
Oklahoma City Thunder (ex Seattle)	29.9	97.1	0.876327	18203	9.80934	2747614	14.8262	0	35535	35535	10.4783	5	2	0	0	2002	10	0	NBA	Basketball	2012	0	1	0	0	0	0	0	0	0	0	1	1811037	14.4094	399768	12.8986
Orlando Magic	12	114	1.02885	18896.6	9.84674	6533122	15.6924	3	48723	48723	10.7939	2	4	0	0	1990	22	0	NBA	Basketball	2012	0	1	0	0	0	0	0	0	0	0	1	1690199	14.3404	1090073	13.9018
Philadelphia 76ers	-0.8	107.8	0.972895	17502.9	9.77012	4281899	15.2699	3	36833	36833	10.5141	3	0	2	0.0307692	1997	15	1	NBA	Basketball	2012	0	1	0	0	0	0	0	0	0	0	1	308996	12.6411	161127	11.9899
Phoenix Suns	13	108	0.9747	15597.5	9.65487	2599142	14.7707	0	43960	43960	10.691	1	4	0	0	1993	19	0	NBA	Basketball	2012	0	1	0	0	0	0	0	0	0	0	1	745807	13.5222	156905	11.9634
Portland Trail Blazers	-10.1	127.1	1.14708	20496.5	9.92801	2436109	14.7059	0	40745	40745	10.6151	1	2	1	0.0153846	1996	16	1	NBA	Basketball	2012	0	1	0	0	0	0	0	0	0	0	1	426291	12.9629	128334	11.7624
Sacramento Kings	2.6	93.4	0.842935	14508	9.58246	2031445	14.5243	0	36781	36781	10.5127	0	0	0	0	1989	23	1	NBA	Basketball	2012	0	1	0	0	0	0	0	0	0	0	1	239160	12.3849	109293	11.6018
San Antonio Spurs	14.7	120.3	1.08571	18396.8	9.81993	4158293	15.2406	2	50944	50944	10.8385	4	3	4	0.0615385	2003	9	0	NBA	Basketball	2012	0	1	0	0	0	0	0	0	0	0	1	1449895	14.187	247069	12.4174
Toronto Raptors	18.8	102.2	0.922355	16835.9	9.73127	5509874	15.5221	2	41700	41700	10.6383	0	1	0	0	2000	12	1	NBA	Basketball	2012	0	1	0	0	0	0	0	0	0	0	1	382158	12.8536	144381	11.8802
Utah Jazz	12.1	98.9	0.892572	19306.8	9.86821	1743364	14.3713	0	39595	39595	10.5865	2	3	0	0	1992	20	1	NBA	Basketball	2012	0	1	0	0	0	0	0	0	0	0	1	366114	12.8107	142722	11.8687
Washington Wizards	1.7	100.3	0.905207	16728.4	9.72486	8440617	15.9486	5	59345	59345	10.9911	0	0	0	0	1998	14	0	NBA	Basketball	2012	0	1	0	0	0	0	0	0	0	0	1	174657	12.0706	119217	11.6887
Arizona Cardinals	20.5	225.5	0.961185	60890.6	11.0168	4282899	15.2701	3	36833	36833	10.5141	1	1	0	0	2006	6	0	NFL	Football	2012	0	0	0	1	0	0	0	0	0	0	1	538690	13.1969	42734	10.6628
Atlanta Falcons	15.3	223.7	0.953513	70096.6	11.1576	5831778	15.5788	3	39713	39713	10.5894	2	3	0	0	1992	20	0	NFL	Football	2012	0	0	0	1	0	0	0	0	0	0	1	986843	13.8023	192787	12.1693
Baltimore Ravens	48.6	230.4	0.982071	71278.6	11.1744	8440617	15.9486	5	51126	51126	10.842	4	3	1	0.010989	1998	14	0	NFL	Football	2012	0	0	0	1	0	0	0	0	0	0	1	1351744	14.1169	271843	12.513
Buffalo Bills	29.4	210.6	0.897674	64950.4	11.0814	1203493	14.0007	1	40121	40121	10.5997	1	1	0	0	1973	39	0	NFL	Football	2012	0	0	0	1	0	0	0	0	0	0	1	426637	12.9637	135741	11.8185
Carolina Panthers	11.5	257.5	1.09758	73293.4	11.2022	2389763	14.6867	2	40223	40223	10.6022	1	0	0	0	1996	16	1	NFL	Football	2012	0	0	0	1	0	0	0	0	0	0	1	558943	13.2338	139463	11.8456
Chicago Bears	65.3	220.7	0.940725	62329.1	11.0402	9804845	16.0984	4	45977	45977	10.7359	1	4	9	0.0989011	1924	88	0	NFL	Football	2012	0	0	0	1	0	0	0	0	0	0	1	2672712	14.7986	263266	12.4809
Cincinnati Bengals	18.1	216.9	0.924528	61188	11.0217	2214954	14.6107	1	40918	40918	10.6193	2	1	0	0	2000	12	0	NFL	Football	2012	0	0	0	1	0	0	0	0	0	0	1	634147	13.36	142852	11.8696
Cleveland Browns	28.7	229.3	0.977382	66632.2	11.1069	2891988	14.8775	2	42365	42365	10.6541	1	1	4	0.043956	1999	13	0	NFL	Football	2012	0	0	0	1	0	0	0	0	0	0	1	621258	13.3395	137832	11.8338
Dallas Cowboys	226.7	273.3	1.16493	88531.1	11.3911	6805275	15.7332	3	43708	43708	10.6853	1	1	5	0.0549451	2009	3	0	NFL	Football	2012	0	0	0	1	0	0	0	0	0	0	1	5331533	15.4891	513893	13.1498
Denver Broncos	49.3	226.7	0.9663	76632.8	11.2468	3110436	14.9503	3	48980	48980	10.7992	3	1	2	0.021978	2001	11	0	NFL	Football	2012	0	0	0	1	0	0	0	0	0	0	1	1495005	14.2176	241759	12.3957
Detroit Lions	-4.6	235.6	1.00424	63769.8	11.063	5327764	15.4884	3	40009	40009	10.5969	2	1	4	0.043956	2002	10	0	NFL	Football	2012	0	0	0	1	0	0	0	0	0	0	1	838033	13.6388	1933	7.56683
Green Bay Packers	43.1	232.9	0.992727	70507.8	11.1635	279485	12.5407	0	39046	39046	10.5725	3	6	13	0.142857	1957	55	0	NFL	Football	2012	0	0	0	1	0	0	0	0	0	0	1	3441446	15.0514	415195	12.9365
Houston Texans	61.9	242.1	1.03194	71665.1	11.1798	5968586	15.602	2	47612	47612	10.7708	3	1	0	0	2002	10	0	NFL	Football	2012	0	0	0	1	0	0	0	0	0	0	1	831028	13.6304	213499	12.2714
Indianapolis Colts	62.6	205.4	0.875509	65189.8	11.0851	2064870	14.5406	1	40572	40572	10.6108	0	2	1	0.010989	2008	4	0	NFL	Football	2012	0	0	0	1	0	0	0	0	0	0	1	1679102	14.3338	137666	11.8326
Jacksonville Jaguars	29.6	208.4	0.888297	64984	11.0819	1313228	14.088	0	40709	40709	10.6142	1	1	0	0	1995	17	0	NFL	Football	2012	0	0	0	1	0	0	0	0	0	0	1	300998	12.6149	64947	11.0813
Kansas City Chiefs	46.4	212.6	0.906199	6850.88	8.83213	2136653	14.5748	1	43062	43062	10.6704	1	2	1	0.010989	1972	40	0	NFL	Football	2012	0	0	0	1	0	0	0	0	0	0	1	655153	13.3926	132263	11.7925
Miami Dolphins	14.5	250.5	1.06775	57379.1	10.9574	5950855	15.599	3	43072	43072	10.6706	1	1	2	0.021978	1987	25	1	NFL	Football	2012	0	0	0	1	0	0	0	0	0	0	1	1302207	14.0796	189086	12.15
Minnesota Vikings	7.2	219.8	0.936889	60725.2	11.0141	3604460	15.0977	3	48657	48657	10.7926	0	1	0	0	1982	30	0	NFL	Football	2012	0	0	0	1	0	0	0	0	0	0	1	1413133	14.1613	182665	12.1154
New England Patriots	118.8	261.2	1.11335	68755.5	11.1383	7609358	15.8449	3	57893	57893	10.9664	5	3	3	0.032967	2002	10	1	NFL	Football	2012	0	0	0	1	0	0	0	0	0	0	1	3973798	15.1952	545771	13.21
New Orleans Saints	37	222	0.946266	72888.4	11.1967	1235650	14.0271	1	43603	43603	10.6829	3	2	1	0.010989	1975	37	0	NFL	Football	2012	0	0	0	1	0	0	0	0	0	0	1	2923891	14.8884	287814	12.5701
New York Giants	59	267	1.13808	80495.5	11.296	22232494	16.9171	8	56770	56770	10.9468	6	1	7	0.0769231	2010	2	0	NFL	Football	2012	0	0	0	1	0	0	0	0	0	0	1	2617078	14.7776	426234	12.9627
New York Jets	27	272	1.15939	79088	11.2783	22232494	16.9171	8	56770	56770	10.9468	1	4	1	0.010989	2010	2	0	NFL	Football	2012	0	0	0	1	0	0	0	0	0	0	1	1495993	14.2183	544189	13.2071
Oakland Raiders	-15.2	241.2	1.02811	54216.5	10.9007	7427757	15.8207	5	61395	61395	11.0251	1	1	3	0.032967	1966	46	0	NFL	Football	2012	0	0	0	1	0	0	0	0	0	0	1	1857859	14.4349	223992	12.3194
Philadelphia Eagles	48.2	247.8	1.05624	69144	11.1439	6533122	15.6924	3	48723	48723	10.7939	1	2	3	0.032967	2003	9	0	NFL	Football	2012	0	0	0	1	0	0	0	0	0	0	1	2012873	14.5151	264252	12.4847
Pittsburgh Steelers	-0.8	266.8	1.13722	61141.9	11.021	2445117	14.7096	2	44982	44982	10.714	2	5	6	0.0659341	2001	11	0	NFL	Football	2012	0	0	0	1	0	0	0	0	0	0	1	4828027	15.3899	492452	13.1072
San Diego Chargers	22.5	223.5	0.95266	59964.5	11.0015	5009170	15.4268	1	46800	46800	10.7536	1	1	0	0	1967	45	0	NFL	Football	2012	0	0	0	1	0	0	0	0	0	0	1	1207884	14.0044	184623	12.1261
San Francisco 49ers	30	215	0.916429	69732	11.1524	7427757	15.8207	5	61395	61395	11.0251	4	1	5	0.0549451	1960	52	0	NFL	Football	2012	0	0	0	1	0	0	0	0	0	0	1	1679927	14.3343	331441	12.7112
Seattle Seahawks	16.4	243.6	1.03834	67946.2	11.1265	4158293	15.2406	2	50944	50944	10.8385	1	3	0	0	2002	10	0	NFL	Football	2012	0	0	0	1	0	0	0	0	0	0	1	840928	13.6423	194864	12.1801
St Louis Rams	6.7	224.3	0.95607	56703.6	10.9456	2892874	14.8778	2	42864	42864	10.6658	0	1	1	0.010989	1995	17	0	NFL	Football	2012	0	0	0	1	0	0	0	0	0	0	1	407867	12.9187	96179	11.474
Tampa Bay Buccaneers	44.1	213.9	0.91174	55102.4	10.9169	4152238	15.2392	2	39261	39261	10.578	1	1	1	0.010989	1998	14	0	NFL	Football	2012	0	0	0	1	0	0	0	0	0	0	1	537769	13.1952	97903	11.4917
Tennessee Titans	38.8	223.2	0.951381	69143	11.1439	1666566	14.3263	1	42129	42129	10.6485	1	1	0	0	1999	13	0	NFL	Football	2012	0	0	0	1	0	0	0	0	0	0	1	520101	13.1618	111600	11.6227
Washington Redskins	109	264	1.12529	79654.5	11.2855	8440617	15.9486	5	59345	59345	10.9911	1	1	5	0.0549451	1997	15	1	NFL	Football	2012	0	0	0	1	0	0	0	0	0	0	1	1086833	13.8988	188398	12.1463
Boston Bruins	14.2	114.8	1.09802	17564.5	9.77364	7609358	15.8449	3	57893	57893	10.9664	2	6	7	0.076087	1996	16	1	NHL	Hockey	2012	0	0	1	0	0	0	0	0	0	0	1	1298862	14.077	279816	12.5419
Buffalo Sabres	-10.4	105.4	1.00811	18550.2	9.82824	1203493	14.0007	1	40121	40121	10.5997	1	2	0	0	1997	15	0	NHL	Hockey	2012	0	0	1	0	0	0	0	0	0	0	1	339633	12.7356	124728	11.7339
Calgary Flames	11	106	1.01385	19289	9.86729	1139126	13.9458	0	52400	52400	10.8667	1	1	1	0.0108696	1983	29	0	NHL	Hockey	2012	0	0	1	0	0	0	0	0	0	0	1	199429	12.2032	138821	11.8409
Carolina Hurricanes	-9.4	94.4	0.902902	16042.6	9.683	2389763	14.6867	2	40223	40223	10.6022	1	1	1	0.0108696	2000	12	0	NHL	Hockey	2012	0	0	1	0	0	0	0	0	0	0	1	173220	12.0623	74119	11.2134
Chicago Black Hawks	20.5	104.5	0.999505	21533.5	9.97737	9804845	16.0984	4	45977	45977	10.7359	2	2	4	0.0434783	1995	17	1	NHL	Hockey	2012	0	0	1	0	0	0	0	0	0	0	1	1223067	14.0169	247186	12.4179
Colorado Avalanche	4.5	86.5	0.827342	15498.5	9.6485	3110436	14.9503	3	48980	48980	10.7992	1	0	2	0.0217391	2000	12	1	NHL	Hockey	2012	0	0	1	0	0	0	0	0	0	0	1	386526	12.865	96604	11.4784
Columbus Blue Jackets	-18.7	103.7	0.991854	14660	9.59288	2031229	14.5242	0	40188	40188	10.6013	0	1	0	0	1983	29	1	NHL	Hockey	2012	0	0	1	0	0	0	0	0	0	0	1	95567	11.4676	71056	11.1712
Dallas Stars	3	97	0.92777	14227	9.5629	6805275	15.7332	3	43708	43708	10.6853	1	1	1	0.0108696	2002	10	0	NHL	Hockey	2012	0	0	1	0	0	0	0	0	0	0	1	175044	12.0728	90046	11.4081
Detroit Red Wings	20.8	107.2	1.02533	20114.8	9.90921	5327764	15.4884	3	40009	40009	10.5969	2	3	11	0.119565	1980	32	0	NHL	Hockey	2012	0	0	1	0	0	0	0	0	0	0	1	1347990	14.1141	246552	12.4153
Ducks of Anaheim	-10.8	101.8	0.973681	14760.3	9.59969	17820893	16.6959	5	44423	44423	10.7015	1	2	1	0.0108696	1994	18	0	NHL	Hockey	2012	0	0	1	0	0	0	0	0	0	0	1	203539	12.2236	86910	11.3726
Edmonton Oilers	16.2	89.8	0.858905	16839	9.73145	1081275	13.8937	0	45400	45400	10.7233	1	0	5	0.0543478	1975	37	1	NHL	Hockey	2012	0	0	1	0	0	0	0	0	0	0	1	252629	12.4397	186739	12.1375
Florida Panthers	-12	99	0.9469	16628.4	9.71887	5950855	15.599	3	43072	43072	10.6706	2	1	0	0	1999	13	0	NHL	Hockey	2012	0	0	1	0	0	0	0	0	0	0	1	82191	11.3168	64598	11.0759
Los Angeles Kings	1.8	118.2	1.13054	17920.4	9.79369	17820893	16.6959	5	44423	44423	10.7015	6	2	0	0	2000	12	1	NHL	Hockey	2012	0	0	1	0	0	0	0	0	0	0	1	333624	12.7178	188619	12.1475
Minnesota Wild	-3.9	102.9	0.984202	17772.8	9.78542	3604460	15.0977	3	48657	48657	10.7926	1	1	0	0	2001	11	0	NHL	Hockey	2012	0	0	1	0	0	0	0	0	0	0	1	187220	12.14	110188	11.6099
Montreal Canadiens	51.6	117.4	1.12289	21273	9.96519	3859318	15.166	0	36600	36600	10.5078	1	2	24	0.26087	1997	15	1	NHL	Hockey	2012	0	0	1	0	0	0	0	0	0	0	1	995091	13.8106	356176	12.7832
Nashville Predators	-3.4	91.4	0.874208	16690.8	9.72261	1666566	14.3263	1	42129	42129	10.6485	3	3	0	0	1997	15	0	NHL	Hockey	2012	0	0	1	0	0	0	0	0	0	0	1	130606	11.7799	90321	11.4111
New Jersey Devils	2.8	119.2	1.14011	15396.5	9.6419	22232494	16.9171	8	56770	56770	10.9468	5	2	3	0.0326087	2007	5	0	NHL	Hockey	2012	0	0	1	0	0	0	0	0	0	0	1	322945	12.6852	144961	11.8842
New York Islanders	-16	82	0.784301	13191.2	9.4873	22232494	16.9171	8	56770	56770	10.9468	1	1	4	0.0434783	1973	39	0	NHL	Hockey	2012	0	0	1	0	0	0	0	0	0	0	1	112506	11.6308	63664	11.0614
New York Rangers	74	125	1.19558	18191.5	9.80871	22232494	16.9171	8	56770	56770	10.9468	4	2	4	0.0434783	1969	43	1	NHL	Hockey	2012	0	0	1	0	0	0	0	0	0	0	1	896032	13.7057	198445	12.1983
Ottawa Senators	14.5	98.5	0.942117	19356.4	9.87078	1168788	13.9715	0	47700	47700	10.7727	2	1	0	0	1996	16	1	NHL	Hockey	2012	0	0	1	0	0	0	0	0	0	0	1	159470	11.9796	98217	11.4949
Philadelphia Flyers	10.9	113.1	1.08176	20433	9.92491	6533122	15.6924	3	48723	48723	10.7939	3	3	2	0.0217391	1997	15	1	NHL	Hockey	2012	0	0	1	0	0	0	0	0	0	0	1	849046	13.6519	226457	12.3303
Phoenix Coyotes	-20.6	103.6	0.990897	12420.5	9.4271	4281899	15.2699	3	36833	36833	10.5141	4	2	0	0	2004	8	0	NHL	Hockey	2012	0	0	1	0	0	0	0	0	0	0	1	111087	11.6181	66331	11.1024
Pittsburgh Penguins	9.1	110.9	1.06072	18566.4	9.82911	2445117	14.7096	2	44982	44982	10.714	2	2	3	0.0326087	1962	50	0	NHL	Hockey	2012	0	0	1	0	0	0	0	0	0	0	1	1245711	14.0352	306791	12.6339
San Jose Sharks	-0.9	101.9	0.974637	17562.8	9.77354	7427757	15.8207	5	61028	61028	11.0191	2	4	0	0	1994	18	0	NHL	Hockey	2012	0	0	1	0	0	0	0	0	0	0	1	508604	13.1394	120975	11.7033
St Louis Blues	-10	99	0.9469	18809.9	9.84214	2892874	14.8778	2	42864	42864	10.6658	3	1	0	0	1995	17	0	NHL	Hockey	2012	0	0	1	0	0	0	0	0	0	0	1	271102	12.5103	122146	11.713
Tampa Bay Lightning	-13.1	101.1	0.966985	18468.1	9.8238	4152238	15.2392	2	39261	39261	10.578	1	4	1	0.0108696	1997	15	1	NHL	Hockey	2012	0	0	1	0	0	0	0	0	0	0	1	265229	12.4883	92662	11.4367
Toronto Maple Leafs	81.9	118.1	1.12958	19507	9.87853	5509874	15.5221	2	41700	41700	10.6383	1	1	11	0.119565	2000	12	1	NHL	Hockey	2012	0	0	1	0	0	0	0	0	0	0	1	644358	13.376	250711	12.4321
Vancouver Canucks	30.4	112.6	1.07698	18883	9.84602	2374628	14.6804	0	37800	37800	10.5401	2	5	0	0	1996	16	1	NHL	Hockey	2012	0	0	1	0	0	0	0	0	0	0	1	796228	13.5876	340095	12.737
Washington Capitals	-1	107	1.02342	18506	9.82585	8440617	15.9486	5	59345	59345	10.9911	3	3	0	0	1998	14	1	NHL	Hockey	2012	0	0	1	0	0	0	0	0	0	0	1	496168	13.1147	146415	11.8942
Arsenal	55	313	1.15341	60079	11.0034	12448448	16.3371	2	26762	34405.2	10.446	2	2	0	0	2006	7	1	England	Soccer	2013	0	0	0	0	1	0	0	0	0	0	0	19816272	16.802	3414761	15.0436
Chelsea	82	327	1.205	41462	10.6325	12448448	16.3371	2	26762	34405.2	10.446	1	6	1	0.0172414	1877	136	1	England	Soccer	2013	0	0	0	0	1	0	0	0	0	0	0	22515580	16.9297	3323080	15.0164
Liverpool	19	277	1.02075	44479	10.7028	5327077	15.4883	2	15011.6	19298.9	9.8678	0	0	5	0.0862069	1884	129	1	England	Soccer	2013	0	0	0	0	1	0	0	0	0	0	0	15129659	16.5322	2306524	14.6513
Manchester City	-53	415	1.52929	46974	10.7573	5327077	15.4883	2	15011.6	19298.9	9.8678	1	1	0	0	2002	11	0	England	Soccer	2013	0	0	0	0	1	0	0	0	0	0	0	8900957	16.0017	1465137	14.1975
Manchester United	144	358	1.31924	75530	11.2323	5327077	15.4883	2	15011.6	19298.9	9.8678	2	1	3	0.0517241	1910	103	1	England	Soccer	2013	0	0	0	0	1	0	0	0	0	0	0	40629324	17.52	1848601	14.4299
Newcastle United	16	130	0.479054	50517	10.8301	1481013	14.2082	0	18354.2	24297.9	10.0981	0	0	0	0	1880	133	1	England	Soccer	2013	0	0	0	0	1	0	0	0	0	0	0	802896	13.596	337205	12.7284
Tottenham Hotspur	36	190	0.700155	36067	10.4931	12448448	16.3371	2	15011.6	19298.9	9.8678	0	0	0	0	1899	114	1	England	Soccer	2013	0	0	0	0	1	0	0	0	0	0	0	3848203	15.1631	755468	13.5351
Olympique Lyonnais	-6	173	0.63751	32086	10.3762	1771459	14.3873	0	21939.2	28205	10.2473	0	2	0	0	1920	93	0	France	Soccer	2013	0	0	0	0	0	1	0	0	0	0	0	1050525	13.8648	239948	12.3882
Olympique Marseille	-13	180	0.663305	33473	10.4185	1621766	14.299	0	19927.5	25618.8	10.1511	0	3	1	0.0172414	1937	76	0	France	Soccer	2013	0	0	0	0	0	1	0	0	0	0	0	2873088	14.8709	862457	13.6675
Bayern Munich	88	380	1.40031	71000	11.1704	2312477	14.6538	0	24718	31777.5	10.3665	6	5	5	0.0862069	2005	8	1	Germany	Soccer	2013	0	0	0	0	0	0	1	0	0	0	0	12065477	16.3059	878616	13.6861
Borussia Dortmund	54	186	0.685415	80520	11.2963	11316429	16.2418	1	22723.3	29213.1	10.2824	5	1	1	0.0172414	1974	39	1	Germany	Soccer	2013	0	0	0	0	0	0	1	0	0	0	0	6983438	15.7591	759841	13.5409
Hamburg SV	6	148	0.545384	52916	10.8765	3266896	14.9994	0	28818.2	37048.7	10.52	0	0	1	0.0172414	1953	60	1	Germany	Soccer	2013	0	0	0	0	0	0	1	0	0	0	0	566026	13.2464	104361	11.5556
Schalke 04	47	174	0.641195	61171	11.0214	11316429	16.2418	1	22723.3	29213.1	10.2824	2	0	0	0	2001	12	1	Germany	Soccer	2013	0	0	0	0	0	0	1	0	0	0	0	1796625	14.4014	151898	11.931
AC Milan	19	307	1.1313	43651	10.684	7123563	15.7789	1	23411.8	30098.2	10.3122	2	3	7	0.12069	1926	87	0	Italy	Soccer	2013	0	0	0	0	0	0	0	1	0	0	0	19635788	16.7929	1736619	14.3675
Internazionale Milan	-89	325	1.19763	46551	10.7483	7123563	15.7789	1	23411.8	30098.2	10.3122	0	2	3	0.0517241	1926	87	0	Italy	Soccer	2013	0	0	0	0	0	0	0	1	0	0	0	3181037	14.9727	457322	13.0331
Juventus	20	228	0.840186	38600	10.561	2136362	14.5746	0	21203.9	27259.7	10.2132	3	0	2	0.0344828	1933	80	0	Italy	Soccer	2013	0	0	0	0	0	0	0	1	0	0	0	9852589	16.1032	966195	13.7811
Napoli	76	112	0.412723	39636	10.5875	3917763	15.181	0	12103.6	15560.4	9.65248	0	2	0	0	1959	54	0	Italy	Soccer	2013	0	0	0	0	0	0	0	1	0	0	0	1551508	14.2547	254601	12.4475
Barcelona	160	453	1.66932	71120	11.1721	4971701	15.4193	0	18597.7	23909.2	10.082	4	4	4	0.0689655	1957	56	1	Spain	Soccer	2013	0	0	0	0	0	0	0	0	1	0	0	53664178	17.7983	11016588	16.2149
Real Madrid	170	480	1.76881	69988	11.1561	6321398	15.6595	1	21027.5	27033	10.2048	4	4	9	0.155172	1947	66	1	Spain	Soccer	2013	0	0	0	0	0	0	0	0	1	0	0	50177331	17.7311	10033283	16.1214
Arizona Diamondbacks	7.6	187.4	0.876547	26355	10.1794	4282899	15.2701	3	36833	36833	10.5141	2	2	1	0.00892857	1998	15	0	MLB	baseball	2013	1	0	0	0	0	0	0	0	0	0	0	383794	12.8579	112077	11.6269
Atlanta Braves	12.4	212.6	0.994418	31465	10.3566	5831778	15.5788	3	39713	39713	10.5894	3	2	1	0.00892857	1997	16	1	MLB	baseball	2013	1	0	0	0	0	0	0	0	0	0	0	1482789	14.2094	436756	12.9871
Baltimore Orioles	30.1	175.9	0.822757	29105	10.2787	8440617	15.9486	5	51126	51126	10.842	2	3	3	0.0267857	1992	21	0	MLB	baseball	2013	1	0	0	0	0	0	0	0	0	0	0	586782	13.2824	189518	12.1522
Boston Red Sox	23.9	312.1	1.45982	34979	10.4625	7609358	15.8449	3	57893	57893	10.9664	6	0	8	0.0714286	1912	101	1	MLB	baseball	2013	1	0	0	0	0	0	0	0	0	0	0	4250375	15.2625	699761	13.4585
Chicago Cubs	32.1	241.9	1.13147	32625	10.3928	9804845	16.0984	4	45977	45977	10.7359	0	0	2	0.0178571	1914	99	1	MLB	baseball	2013	1	0	0	0	0	0	0	0	0	0	0	1906264	14.4607	303266	12.6224
Chicago White Sox	22.9	193.1	0.903209	22105	10.0036	9804845	16.0984	4	45977	45977	10.7359	0	2	3	0.0267857	1991	22	0	MLB	baseball	2013	1	0	0	0	0	0	0	0	0	0	0	1162918	13.9664	170016	12.0436
Cincinnati Reds	20.9	181.1	0.84708	31288	10.351	2214954	14.6107	1	40918	40918	10.6193	3	3	5	0.0446429	2003	10	0	MLB	baseball	2013	1	0	0	0	0	0	0	0	0	0	0	784456	13.5727	262275	12.4771
Cleveland Indians	22.9	163.1	0.762886	19661	9.88639	2891988	14.8775	2	42365	42365	10.6541	3	0	2	0.0178571	1994	19	0	MLB	baseball	2013	1	0	0	0	0	0	0	0	0	0	0	656792	13.3951	174742	12.0711
Colorado Rockies	18.7	180.3	0.843338	34491	10.4485	3110436	14.9503	3	48980	48980	10.7992	1	0	0	0	1995	18	0	MLB	baseball	2013	1	0	0	0	0	0	0	0	0	0	0	597133	13.2999	112874	11.634
Detroit Tigers	-0.4	238.4	1.1151	38066	10.5471	5327764	15.4884	3	40009	40009	10.5969	4	5	4	0.0357143	2000	13	0	MLB	baseball	2013	1	0	0	0	0	0	0	0	0	0	0	1430575	14.1736	372046	12.8268
Florida Marlins	-7.1	202.1	0.945305	19584	9.88247	5950855	15.599	3	43072	43072	10.6706	0	0	2	0.0178571	1987	26	1	MLB	baseball	2013	1	0	0	0	0	0	0	0	0	0	0	359094	12.7913	104181	11.5539
Houston Astros	24.7	171.3	0.801241	20393	9.92295	5968586	15.602	2	47612	47612	10.7708	0	0	0	0	2000	13	0	MLB	baseball	2013	1	0	0	0	0	0	0	0	0	0	0	534284	13.1887	113986	11.6438
Kansas City Royals	16.3	152.7	0.714241	21614	9.9811	2136653	14.5748	1	43062	43062	10.6704	2	0	1	0.00892857	1973	40	0	MLB	baseball	2013	1	0	0	0	0	0	0	0	0	0	0	402038	12.9043	155234	11.9527
Los Angeles Angels of Anaheim	-12.9	251.9	1.17824	37277	10.5261	17820893	16.6959	5	44423	44423	10.7015	1	2	1	0.00892857	1966	47	0	MLB	baseball	2013	1	0	0	0	0	0	0	0	0	0	0	703361	13.4636	147191	11.8995
Los Angeles Dodgers	3.2	241.8	1.131	46216	10.7411	17820893	16.6959	5	44423	44423	10.7015	4	2	5	0.0446429	1962	51	1	MLB	baseball	2013	1	0	0	0	0	0	0	0	0	0	0	1776691	14.3903	438539	12.9912
Milwaukee Brewers	9	192	0.898064	31248	10.3497	1760268	14.381	1	44610	44610	10.7057	1	2	1	0.00892857	2001	12	0	MLB	baseball	2013	1	0	0	0	0	0	0	0	0	0	0	694995	13.4517	164511	12.0107
Minnesota Twins	10.8	203.2	0.950451	30588	10.3284	3604460	15.0977	3	48657	48657	10.7926	0	0	2	0.0178571	2010	3	0	MLB	baseball	2013	1	0	0	0	0	0	0	0	0	0	0	860944	13.6658	184397	12.1248
New York Mets	-2.4	234.4	1.09639	26695	10.1922	22232494	16.9171	8	56770	56770	10.9468	1	1	2	0.0178571	2009	4	0	MLB	baseball	2013	1	0	0	0	0	0	0	0	0	0	0	736094	13.5091	226060	12.3286
New York Yankees	1.4	469.6	2.19651	40488	10.6088	22232494	16.9171	8	56770	56770	10.9468	2	4	27	0.241071	2009	4	1	MLB	baseball	2013	1	0	0	0	0	0	0	0	0	0	0	6763873	15.7271	1048525	13.8629
Oakland Athletics	27.5	145.5	0.680564	22337	10.014	7427757	15.8207	5	61395	61395	11.0251	3	3	4	0.0357143	1966	47	0	MLB	baseball	2013	1	0	0	0	0	0	0	0	0	0	0	469190	13.0588	153036	11.9384
Philadelphia Phillies	0.6	278.4	1.30219	37190	10.5238	6533122	15.6924	3	48723	48723	10.7939	1	2	2	0.0178571	2004	9	1	MLB	baseball	2013	1	0	0	0	0	0	0	0	0	0	0	1385470	14.1415	795932	13.5873
Pittsburgh Pirates	26.8	151.2	0.707225	28210	10.2474	2445117	14.7096	2	44982	44982	10.714	3	1	5	0.0446429	2001	12	0	MLB	baseball	2013	1	0	0	0	0	0	0	0	0	0	0	583548	13.2769	207751	12.2441
San Diego Padres	29.9	159.1	0.744177	26749	10.1943	5009170	15.4268	1	46800	46800	10.7536	1	1	0	0	2004	9	0	MLB	baseball	2013	1	0	0	0	0	0	0	0	0	0	0	464831	13.0494	102035	11.5331
San Francisco Giants	17.6	244.4	1.14316	41584	10.6355	7427757	15.8207	5	61395	61395	11.0251	1	6	2	0.0178571	2000	13	1	MLB	baseball	2013	1	0	0	0	0	0	0	0	0	0	0	1909130	14.4622	551431	13.2203
Seattle Mariners	12.9	202.1	0.945305	21747	9.98723	4158293	15.2406	2	50944	50944	10.8385	0	1	0	0	1999	14	0	MLB	baseball	2013	1	0	0	0	0	0	0	0	0	0	0	636512	13.3638	153609	11.9422
St Louis Cardinals	19.9	219.1	1.02482	41602	10.6359	2892874	14.8778	2	42864	42864	10.6658	5	4	10	0.0892857	2006	7	1	MLB	baseball	2013	1	0	0	0	0	0	0	0	0	0	0	1623986	14.3004	408274	12.9197
Tampa Bay Rays	10	157	0.734354	18645	9.83333	4152238	15.2392	2	39261	39261	10.578	3	2	0	0	1990	23	0	MLB	baseball	2013	1	0	0	0	0	0	0	0	0	0	0	523280	13.1679	149943	11.918
Texas Rangers	-8.7	247.7	1.1586	38759	10.5651	6805275	15.7332	3	43708	43708	10.6853	2	2	0	0	1994	19	0	MLB	baseball	2013	1	0	0	0	0	0	0	0	0	0	0	1685009	14.3373	351588	12.7702
Toronto Blue Jays	-4.8	207.8	0.971967	31315	10.3519	5509874	15.5221	2	41700	41700	10.6383	1	1	0	0	1989	24	1	MLB	baseball	2013	1	0	0	0	0	0	0	0	0	0	0	614046	13.3278	366805	12.8126
Washington Nationals (ex Montreal)	28.4	196.6	0.91958	32745	10.3965	8440617	15.9486	5	59345	59345	10.9911	2	3	0	0	2008	5	1	MLB	baseball	2013	1	0	0	0	0	0	0	0	0	0	0	278458	12.537	157425	11.9667
Atlanta Hawks	-3.6	122.6	0.956716	15125	9.6241	5831778	15.5788	3	39713	39713	10.5894	2	2	0	0	2000	13	1	NBA	Basketball	2013	0	1	0	0	0	0	0	0	0	0	0	634952	13.3613	190049	12.155
Boston Celtics	46.8	122.2	0.953595	18624	9.83221	7609358	15.8449	3	57893	57893	10.9664	2	4	17	0.257576	1996	17	1	NBA	Basketball	2013	0	1	0	0	0	0	0	0	0	0	0	7520084	15.8331	1357976	14.1215
Charlotte Bobcats	7	108	0.842784	15324	9.63718	2389763	14.6867	2	40223	40223	10.6022	0	0	0	0	2006	7	0	NBA	Basketball	2013	0	1	0	0	0	0	0	0	0	0	0	475649	13.0724	181331	12.1081
Chicago Bulls	52.2	142.8	1.11435	21876	9.99315	9804845	16.0984	4	45977	45977	10.7359	3	2	6	0.0909091	1995	18	1	NBA	Basketball	2013	0	1	0	0	0	0	0	0	0	0	0	11217669	16.233	1325308	14.0972
Cleveland Cavaliers	10.8	134.2	1.04724	16192	9.69227	2891988	14.8775	2	42365	42365	10.6541	0	0	0	0	1995	18	1	NBA	Basketball	2013	0	1	0	0	0	0	0	0	0	0	0	1333119	14.103	280118	12.543
Dallas Mavericks	37.5	124.5	0.971543	20036	9.90529	6805275	15.7332	3	43708	43708	10.6853	1	2	0	0	2002	11	0	NBA	Basketball	2013	0	1	0	0	0	0	0	0	0	0	0	2824006	14.8537	386693	12.8654
Denver Nuggets	8	116	0.905213	17819	9.78802	3110436	14.9503	3	48980	48980	10.7992	2	2	0	0	2000	13	1	NBA	Basketball	2013	0	1	0	0	0	0	0	0	0	0	0	1335114	14.1045	261842	12.4755
Detroit Pistons	10.3	128.7	1.00432	14782	9.60117	5327764	15.4884	3	40009	40009	10.5969	0	0	3	0.0454545	1989	24	1	NBA	Basketball	2013	0	1	0	0	0	0	0	0	0	0	0	799169	13.5913	232116	12.355
Golden State Warriors	43	117	0.913016	19373	9.87164	7427757	15.8207	5	61395	61395	11.0251	3	0	1	0.0151515	1967	46	0	NBA	Basketball	2013	0	1	0	0	0	0	0	0	0	0	0	1142666	13.9489	342327	12.7435
Houston Rockets	63.7	127.3	0.993393	16672	9.72149	5968586	15.602	2	47612	47612	10.7708	2	1	2	0.030303	2004	9	0	NBA	Basketball	2013	0	1	0	0	0	0	0	0	0	0	0	1383905	14.1404	348064	12.7601
Indiana Pacers	11.6	109.4	0.853709	15269	9.63358	2064870	14.5406	1	40572	40572	10.6108	4	3	0	0	2000	13	0	NBA	Basketball	2013	0	1	0	0	0	0	0	0	0	0	0	991903	13.8074	319840	12.6756
Los Angeles Clippers	15	113	0.881802	19226	9.86402	17820893	16.6959	5	44423	44423	10.7015	2	3	0	0	2000	13	1	NBA	Basketball	2013	0	1	0	0	0	0	0	0	0	0	0	1616360	14.2957	472198	13.0652
Los Angeles Lakers	66.4	228.6	1.78389	18997	9.85204	17820893	16.6959	5	44423	44423	10.7015	2	3	11	0.166667	2000	13	1	NBA	Basketball	2013	0	1	0	0	0	0	0	0	0	0	0	18104414	16.7117	3615779	15.1008
Memphis Grizzlies	11.2	114.8	0.895849	16624	9.7186	1285732	14.0668	0	38622	38622	10.5616	4	2	0	0	1992	21	0	NBA	Basketball	2013	0	1	0	0	0	0	0	0	0	0	0	683215	13.4346	236658	12.3744
Miami Heat	29.2	158.8	1.23921	19982	9.90259	5950855	15.599	3	43072	43072	10.6706	6	6	3	0.0454545	2000	13	0	NBA	Basketball	2013	0	1	0	0	0	0	0	0	0	0	0	9958146	16.1139	2198894	14.6035
Milwaukee Bucks	11.5	97.5	0.760847	15035	9.61814	1760268	14.381	1	44610	44610	10.7057	1	1	1	0.0151515	1989	24	0	NBA	Basketball	2013	0	1	0	0	0	0	0	0	0	0	0	523349	13.168	194483	12.1781
Minnesota Timberwolves	-2.7	118.7	0.926282	16340	9.70137	3604460	15.0977	3	48657	48657	10.7926	0	0	0	0	1991	22	0	NBA	Basketball	2013	0	1	0	0	0	0	0	0	0	0	0	676929	13.4253	219380	12.2986
New Jersey Nets	-19	209	1.63094	17187	9.75191	22232494	16.9171	8	56770	56770	10.9468	2	0	0	0	1982	31	0	NBA	Basketball	2013	0	1	0	0	0	0	0	0	0	0	0	1499398	14.2206	383499	12.8571
New Orleans Hornets	11.2	104.8	0.817813	13803	9.53264	1235650	14.0271	1	43603	43603	10.6829	0	0	0	0	1999	14	0	NBA	Basketball	2013	0	1	0	0	0	0	0	0	0	0	0	628178	13.3506	210059	12.2551
New York Knicks	96.3	190.7	1.48814	19033	9.85393	22232494	16.9171	8	56770	56770	10.9468	3	2	2	0.030303	1969	44	1	NBA	Basketball	2013	0	1	0	0	0	0	0	0	0	0	0	4284886	15.2706	849404	13.6523
Oklahoma City Thunder (ex Seattle)	33.3	110.7	0.863854	18203	9.80934	2747614	14.8262	0	35535	35535	10.4783	3	5	0	0	2002	11	0	NBA	Basketball	2013	0	1	0	0	0	0	0	0	0	0	0	2988379	14.9102	679813	13.4296
Orlando Magic	12.3	126.7	0.988711	17595	9.77537	6533122	15.6924	3	48723	48723	10.7939	0	2	0	0	1990	23	0	NBA	Basketball	2013	0	1	0	0	0	0	0	0	0	0	0	2130866	14.572	1146303	13.9521
Philadelphia 76ers	-3.8	120.8	0.94267	16717	9.72418	4281899	15.2699	3	36833	36833	10.5141	1	3	2	0.030303	1997	16	1	NBA	Basketball	2013	0	1	0	0	0	0	0	0	0	0	0	635374	13.362	273563	12.5193
Phoenix Suns	28.2	108.8	0.849027	15436	9.64446	2599142	14.7707	0	43960	43960	10.691	0	1	0	0	1993	20	0	NBA	Basketball	2013	0	1	0	0	0	0	0	0	0	0	0	1143123	13.9493	246301	12.4143
Portland Trail Blazers	30	110	0.858391	19829	9.8949	2436109	14.7059	0	40745	40745	10.6151	1	1	1	0.0151515	1996	17	1	NBA	Basketball	2013	0	1	0	0	0	0	0	0	0	0	0	864445	13.6698	234761	12.3663
Sacramento Kings	12.5	102.5	0.799865	13749	9.52872	2031445	14.5243	0	36781	36781	10.5127	0	0	0	0	1989	24	1	NBA	Basketball	2013	0	1	0	0	0	0	0	0	0	0	0	577370	13.2662	196696	12.1894
San Antonio Spurs	39.4	127.6	0.995734	18431	9.82179	4158293	15.2406	2	50944	50944	10.8385	5	4	4	0.0606061	2003	10	0	NBA	Basketball	2013	0	1	0	0	0	0	0	0	0	0	0	2464665	14.7176	537403	13.1945
Toronto Raptors	28.8	120.2	0.937988	18144	9.8061	5509874	15.5221	2	41700	41700	10.6383	1	0	0	0	2000	13	1	NBA	Basketball	2013	0	1	0	0	0	0	0	0	0	0	0	568020	13.2499	341013	12.7397
Utah Jazz	17.5	113.5	0.885704	18680	9.83521	1743364	14.3713	0	39595	39595	10.5865	1	2	0	0	1992	21	1	NBA	Basketball	2013	0	1	0	0	0	0	0	0	0	0	0	599471	13.3038	225996	12.3283
Washington Wizards	7	115	0.897409	16343	9.70155	8440617	15.9486	5	59345	59345	10.9911	0	0	0	0	1998	15	0	NBA	Basketball	2013	0	1	0	0	0	0	0	0	0	0	0	318948	12.6728	202555	12.2188
Arizona Cardinals	9.7	243.3	1.00353	61033	11.0192	4282899	15.2701	3	36833	36833	10.5141	1	1	0	0	2006	7	0	NFL	Football	2013	0	0	0	1	0	0	0	0	0	0	0	697037	13.4546	84189	11.3408
Atlanta Falcons	18.5	233.5	0.96311	70224	11.1594	5831778	15.5788	3	39713	39713	10.5894	1	2	0	0	1992	21	0	NFL	Football	2013	0	0	0	1	0	0	0	0	0	0	0	1262601	14.0487	282477	12.5514
Baltimore Ravens	48.3	243.7	1.00518	71135	11.1723	8440617	15.9486	5	51126	51126	10.842	1	4	1	0.0107527	1998	15	0	NFL	Football	2013	0	0	0	1	0	0	0	0	0	0	0	1730023	14.3636	411871	12.9285
Buffalo Bills	12.6	243.4	1.00394	66267	11.1014	1203493	14.0007	1	40121	40121	10.5997	1	1	0	0	1973	40	0	NFL	Football	2013	0	0	0	1	0	0	0	0	0	0	0	504210	13.1307	211651	12.2627
Carolina Panthers	28.9	242.1	0.998582	73443	11.2043	2389763	14.6867	2	40223	40223	10.6022	3	1	0	0	1996	17	1	NFL	Football	2013	0	0	0	1	0	0	0	0	0	0	0	889551	13.6985	244796	12.4082
Chicago Bears	63.2	234.8	0.968472	62358	11.0406	9804845	16.0984	4	45977	45977	10.7359	1	1	9	0.0967742	1924	89	0	NFL	Football	2013	0	0	0	1	0	0	0	0	0	0	0	3136211	14.9585	423255	12.9557
Cincinnati Bengals	37.3	212.7	0.877317	63297	11.0556	2214954	14.6107	1	40918	40918	10.6193	2	2	0	0	2000	13	0	NFL	Football	2013	0	0	0	1	0	0	0	0	0	0	0	803602	13.5969	228683	12.3401
Cleveland Browns	17.1	246.9	1.01838	71242	11.1738	2891988	14.8775	2	42365	42365	10.6541	1	1	4	0.0430108	1999	14	0	NFL	Football	2013	0	0	0	1	0	0	0	0	0	0	0	734799	13.5074	220525	12.3038
Dallas Cowboys	250.7	288.3	1.18914	88043	11.3856	6805275	15.7332	3	43708	43708	10.6853	1	1	5	0.0537634	2009	4	0	NFL	Football	2013	0	0	0	1	0	0	0	0	0	0	0	6004672	15.608	772216	13.557
Denver Broncos	31.7	251.3	1.03653	76872	11.2499	3110436	14.9503	3	48980	48980	10.7992	5	3	2	0.0215054	2001	12	0	NFL	Football	2013	0	0	0	1	0	0	0	0	0	0	0	2267049	14.634	466221	13.0524
Detroit Lions	-3.5	251.5	1.03735	63796	11.0634	5327764	15.4884	3	40009	40009	10.5969	1	2	4	0.0430108	2002	11	0	NFL	Football	2013	0	0	0	1	0	0	0	0	0	0	0	1144258	13.9503	312279	12.6517
Green Bay Packers	54.3	227.7	0.939187	77947	11.2638	279485	12.5407	0	39046	39046	10.5725	2	3	13	0.139785	1957	56	0	NFL	Football	2013	0	0	0	1	0	0	0	0	0	0	0	3850471	15.1637	627371	13.3493
Houston Texans	81.5	238.5	0.983733	71658	11.1797	5968586	15.602	2	47612	47612	10.7708	0	3	0	0	2002	11	0	NFL	Football	2013	0	0	0	1	0	0	0	0	0	0	0	1227263	14.0203	349756	12.765
Indianapolis Colts	65	211	0.870305	65950	11.0967	2064870	14.5406	1	40572	40572	10.6108	3	0	1	0.0107527	2008	5	0	NFL	Football	2013	0	0	0	1	0	0	0	0	0	0	0	1866407	14.4395	238302	12.3813
Jacksonville Jaguars	15.5	244.5	1.00848	59940	11.0011	1313228	14.088	0	40709	40709	10.6142	1	1	0	0	1995	18	0	NFL	Football	2013	0	0	0	1	0	0	0	0	0	0	0	361127	12.797	113454	11.6392
Kansas City Chiefs	15	230	0.948674	75359	11.23	2136653	14.5748	1	43062	43062	10.6704	2	1	1	0.0107527	1972	41	0	NFL	Football	2013	0	0	0	1	0	0	0	0	0	0	0	955681	13.7702	245648	12.4117
Miami Dolphins	24.8	243.2	1.00312	64319	11.0716	5950855	15.599	3	43072	43072	10.6706	1	1	2	0.0215054	1987	26	1	NFL	Football	2013	0	0	0	1	0	0	0	0	0	0	0	1545683	14.251	288207	12.5714
Minnesota Vikings	28	206	0.849682	64019	11.0669	3604460	15.0977	3	48657	48657	10.7926	1	0	0	0	1982	31	0	NFL	Football	2013	0	0	0	1	0	0	0	0	0	0	0	1527837	14.2394	293676	12.5902
New England Patriots	139.2	268.8	1.10871	68756	11.1383	7609358	15.8449	3	57893	57893	10.9664	4	5	3	0.0322581	2002	11	1	NFL	Football	2013	0	0	0	1	0	0	0	0	0	0	0	4486588	15.3166	808189	13.6026
New Orleans Saints	22.2	253.8	1.04684	72901	11.1969	1235650	14.0271	1	43603	43603	10.6829	3	3	1	0.0107527	1975	38	0	NFL	Football	2013	0	0	0	1	0	0	0	0	0	0	0	3315873	15.0142	445450	13.0068
New York Giants	64.4	273.6	1.12851	80148	11.2916	22232494	16.9171	8	56770	56770	10.9468	1	6	7	0.0752688	2010	3	0	NFL	Football	2013	0	0	0	1	0	0	0	0	0	0	0	2941698	14.8945	544346	13.2073
New York Jets	52.8	268.2	1.10624	76957	11.251	22232494	16.9171	8	56770	56770	10.9468	1	1	1	0.0107527	2010	3	0	NFL	Football	2013	0	0	0	1	0	0	0	0	0	0	0	1596124	14.2831	621544	13.34
Oakland Raiders	19.1	209.9	0.865768	50444	10.8286	7427757	15.8207	5	61395	61395	11.0251	1	1	3	0.0322581	1966	47	0	NFL	Football	2013	0	0	0	1	0	0	0	0	0	0	0	2220028	14.613	324114	12.6889
Philadelphia Eagles	47.8	258.2	1.06499	69144	11.1439	6533122	15.6924	3	48723	48723	10.7939	2	1	3	0.0322581	2003	10	0	NFL	Football	2013	0	0	0	1	0	0	0	0	0	0	0	2328776	14.6609	420561	12.9493
Pittsburgh Steelers	28.3	237.7	0.980434	57311	10.9562	2445117	14.7096	2	44982	44982	10.714	1	2	6	0.0645161	2001	12	0	NFL	Football	2013	0	0	0	1	0	0	0	0	0	0	0	5188703	15.462	676072	13.4241
San Diego Chargers	30.4	219.6	0.905777	64205	11.0698	5009170	15.4268	1	46800	46800	10.7536	3	1	0	0	1967	46	0	NFL	Football	2013	0	0	0	1	0	0	0	0	0	0	0	1366522	14.1278	269505	12.5043
San Francisco 49ers	10.2	244.8	1.00972	69732	11.1524	7427757	15.8207	5	61395	61395	11.0251	4	4	5	0.0537634	1960	53	0	NFL	Football	2013	0	0	0	1	0	0	0	0	0	0	0	2515919	14.7381	609915	13.3211
Seattle Seahawks	28.2	241.8	0.997345	68197	11.1302	4158293	15.2406	2	50944	50944	10.8385	6	1	1	0.0107527	2002	11	0	NFL	Football	2013	0	0	0	1	0	0	0	0	0	0	0	1476755	14.2054	428762	12.9687
St Louis Rams	21.1	217.9	0.898765	56957	10.9501	2892874	14.8778	2	42864	42864	10.6658	1	0	1	0.0107527	1995	18	0	NFL	Football	2013	0	0	0	1	0	0	0	0	0	0	0	475288	13.0717	155837	11.9566
Tampa Bay Buccaneers	2.2	264.8	1.09221	58818	10.9822	4152238	15.2392	2	39261	39261	10.578	1	1	1	0.0107527	1998	15	0	NFL	Football	2013	0	0	0	1	0	0	0	0	0	0	0	635945	13.3629	153275	11.94
Tennessee Titans	40	230	0.948674	69143	11.1439	1666566	14.3263	1	42129	42129	10.6485	1	1	0	0	1999	14	0	NFL	Football	2013	0	0	0	1	0	0	0	0	0	0	0	609601	13.3206	164897	12.0131
Washington Redskins	104.3	276.7	1.1413	77220	11.2544	8440617	15.9486	5	59345	59345	10.9911	0	1	5	0.0537634	1997	16	1	NFL	Football	2013	0	0	0	1	0	0	0	0	0	0	0	1314474	14.0889	276554	12.5302
Boston Bruins	18.5	95.5	1.18403	17565	9.77366	7609358	15.8449	3	57893	57893	10.9664	5	2	7	0.0752688	1996	17	1	NHL	Hockey	2013	0	0	1	0	0	0	0	0	0	0	0	1559420	14.2598	492898	13.1081
Buffalo Sabres	-1	77	0.954664	18970	9.85061	1203493	14.0007	1	40121	40121	10.5997	1	1	0	0	1997	16	0	NHL	Hockey	2013	0	0	1	0	0	0	0	0	0	0	0	372926	12.8291	184334	12.1245
Calgary Flames	11.5	77.5	0.960863	19289	9.86729	1139126	13.9458	0	52400	52400	10.8667	1	1	1	0.0107527	1983	30	0	NHL	Hockey	2013	0	0	1	0	0	0	0	0	0	0	0	223706	12.3181	199873	12.2054
Carolina Hurricanes	-3.4	74.4	0.922428	17558	9.77326	2389763	14.6867	2	40223	40223	10.6022	1	1	1	0.0107527	2000	13	0	NHL	Hockey	2013	0	0	1	0	0	0	0	0	0	0	0	198650	12.1993	112518	11.6309
Chicago Black Hawks	25.6	89.4	1.1084	21775	9.98852	9804845	16.0984	4	45977	45977	10.7359	6	2	5	0.0537634	1995	18	1	NHL	Hockey	2013	0	0	1	0	0	0	0	0	0	0	0	1634661	14.3069	491734	13.1057
Colorado Avalanche	0.3	66.7	0.826962	15444	9.64498	3110436	14.9503	3	48980	48980	10.7992	0	1	2	0.0215054	2000	13	1	NHL	Hockey	2013	0	0	1	0	0	0	0	0	0	0	0	480417	13.0824	152637	11.9358
Columbus Blue Jackets	4.9	64.1	0.794727	14564	9.58631	2031229	14.5242	0	40188	40188	10.6013	1	0	0	0	1983	30	1	NHL	Hockey	2013	0	0	1	0	0	0	0	0	0	0	0	126689	11.7495	113277	11.6376
Dallas Stars	1.6	77.4	0.959623	17063	9.74467	6805275	15.7332	3	43708	43708	10.6853	1	1	1	0.0107527	2002	11	0	NHL	Hockey	2013	0	0	1	0	0	0	0	0	0	0	0	223276	12.3162	144386	11.8802
Detroit Red Wings	10.5	85.5	1.06005	20066	9.90678	5327764	15.4884	3	40009	40009	10.5969	3	2	11	0.11828	1980	33	0	NHL	Hockey	2013	0	0	1	0	0	0	0	0	0	0	0	1525600	14.2379	382871	12.8555
Ducks of Anaheim	-3.9	76.9	0.953424	15887	9.67326	17820893	16.6959	5	44423	44423	10.7015	2	1	1	0.0107527	1994	19	0	NHL	Hockey	2013	0	0	1	0	0	0	0	0	0	0	0	247033	12.4173	135352	11.8156
Edmonton Oilers	10.3	69.7	0.864157	16839	9.73145	1081275	13.8937	0	45400	45400	10.7233	1	1	5	0.0537634	1975	38	1	NHL	Hockey	2013	0	0	1	0	0	0	0	0	0	0	0	307177	12.6352	272239	12.5144
Florida Panthers	-7.7	76.7	0.950944	16991	9.74044	5950855	15.599	3	43072	43072	10.6706	0	2	0	0	1999	14	0	NHL	Hockey	2013	0	0	1	0	0	0	0	0	0	0	0	104869	11.5605	95930	11.4714
Los Angeles Kings	8.2	89.8	1.11336	18178	9.80797	17820893	16.6959	5	44423	44423	10.7015	4	6	0	0	2000	13	1	NHL	Hockey	2013	0	0	1	0	0	0	0	0	0	0	0	446946	13.0102	301703	12.6172
Minnesota Wild	-13.6	94.6	1.17287	18794	9.84129	3604460	15.0977	3	48657	48657	10.7926	2	1	0	0	2001	12	0	NHL	Hockey	2013	0	0	1	0	0	0	0	0	0	0	0	265615	12.4898	187270	12.1403
Montreal Canadiens	29.6	97.4	1.20759	21273	9.96519	3859318	15.166	0	36600	36600	10.5078	2	1	24	0.258065	1997	16	1	NHL	Hockey	2013	0	0	1	0	0	0	0	0	0	0	0	1063719	13.8773	515612	13.1531
Nashville Predators	-0.8	71.8	0.890193	16974	9.73944	1666566	14.3263	1	42129	42129	10.6485	1	3	0	0	1997	16	0	NHL	Hockey	2013	0	0	1	0	0	0	0	0	0	0	0	151529	11.9285	127493	11.7558
New Jersey Devils	-4.2	82.2	1.01913	17114	9.74765	22232494	16.9171	8	56770	56770	10.9468	1	5	3	0.0322581	2007	6	0	NHL	Hockey	2013	0	0	1	0	0	0	0	0	0	0	0	380032	12.848	171425	12.0519
New York Islanders	-1.2	62.2	0.77117	13306	9.49597	22232494	16.9171	8	56770	56770	10.9468	2	1	4	0.0430108	1973	40	0	NHL	Hockey	2013	0	0	1	0	0	0	0	0	0	0	0	147782	11.9035	104741	11.5592
New York Rangers	27.3	103.7	1.2857	17200	9.75266	22232494	16.9171	8	56770	56770	10.9468	3	4	4	0.0430108	1969	44	1	NHL	Hockey	2013	0	0	1	0	0	0	0	0	0	0	0	1097663	13.9087	288186	12.5714
Ottawa Senators	6.8	76.2	0.944745	19408	9.87344	1168788	13.9715	0	47700	47700	10.7727	3	2	0	0	1996	17	1	NHL	Hockey	2013	0	0	1	0	0	0	0	0	0	0	0	206182	12.2365	180877	12.1056
Philadelphia Flyers	6	89	1.10344	19786	9.89273	6533122	15.6924	3	48723	48723	10.7939	1	3	2	0.0215054	1997	16	1	NHL	Hockey	2013	0	0	1	0	0	0	0	0	0	0	0	929554	13.7425	306696	12.6336
Phoenix Coyotes	-8.9	75.9	0.941026	13923	9.5413	4281899	15.2699	3	36833	36833	10.5141	1	4	0	0	2004	9	0	NHL	Hockey	2013	0	0	1	0	0	0	0	0	0	0	0	156301	11.9595	101552	11.5283
Pittsburgh Penguins	20.9	86.1	1.06749	18648	9.83349	2445117	14.7096	2	44982	44982	10.714	4	2	3	0.0322581	1962	51	0	NHL	Hockey	2013	0	0	1	0	0	0	0	0	0	0	0	1480307	14.2078	467798	13.0558
San Jose Sharks	2.1	81.9	1.01542	17561	9.77344	7427757	15.8207	5	61028	61028	11.0191	3	2	0	0	1994	19	0	NHL	Hockey	2013	0	0	1	0	0	0	0	0	0	0	0	625218	13.3459	190108	12.1553
St Louis Blues	-2.5	74.5	0.923668	17263	9.75632	2892874	14.8778	2	42864	42864	10.6658	2	3	0	0	1995	18	0	NHL	Hockey	2013	0	0	1	0	0	0	0	0	0	0	0	352762	12.7735	190730	12.1586
Tampa Bay Lightning	-5.4	77.4	0.959623	19055	9.85508	4152238	15.2392	2	39261	39261	10.578	0	1	1	0.0107527	1997	16	1	NHL	Hockey	2013	0	0	1	0	0	0	0	0	0	0	0	327559	12.6994	139267	11.8441
Toronto Maple Leafs	48.7	93.3	1.15675	19426	9.87437	5509874	15.5221	2	41700	41700	10.6383	2	1	11	0.11828	2000	13	1	NHL	Hockey	2013	0	0	1	0	0	0	0	0	0	0	0	829954	13.6291	507885	13.138
Vancouver Canucks	15.8	85.2	1.05633	18947	9.8494	2374628	14.6804	0	37800	37800	10.5401	2	2	0	0	1996	17	1	NHL	Hockey	2013	0	0	1	0	0	0	0	0	0	0	0	883480	13.6916	476986	13.0752
Washington Capitals	8	75	0.929867	17734	9.78324	8440617	15.9486	5	59345	59345	10.9911	2	3	0	0	1998	15	1	NHL	Hockey	2013	0	0	1	0	0	0	0	0	0	0	0	544229	13.2071	202599	12.219
Winnipeg Thrashers	6.3	72.7	0.901351	15004	9.61607	730018	13.5008	0	37800	37800	10.5401	1	1	0	0	2004	9	1	NHL	Hockey	2013	0	0	1	0	0	0	0	0	0	0	0	42229	10.6509	193684	12.174
